# Supplementary material for: Altered structural brain asymmetry in autism spectrum disorder in a study of 54 datasets
Source: PubMed Central journal article supplement (PMC6823355; doi:10.1038/s41467-019-13005-8), 2019-10-31
Supplement: 41467_2019_13005_MOESM1_ESM.pdf [file 41467_2019_13005_MOESM1_ESM.pdf]

Postema et al.

# Supplementary Information

Altered structural brain asymmetry in autism  
spectrum disorder in a study of 54 datasets

**List of Tables:**

|                                                                                                                                         |    |
|-----------------------------------------------------------------------------------------------------------------------------------------|----|
| <b>Supplementary Table S1.</b> Full linear mixed model results for the cortical thickness AIs .....                                     | 2  |
| <b>Supplementary Table 2.</b> Full linear mixed model results for the cortical surface area AIs. ....                                   | 3  |
| <b>Supplementary Table 3.</b> Full linear mixed model results for the subcortical volume AIs.....                                       | 4  |
| <b>Supplementary Table 4.</b> Results of sensitivity analyses for cortical thickness AIs. ....                                          | 5  |
| <b>Supplementary Table 5.</b> Results of sensitivity analyses for cortical surface area AIs.....                                        | 7  |
| <b>Supplementary Table 6.</b> Results of sensitivity analyses in subcortical volume AIs.....                                            | 9  |
| <b>Supplementary Table 7.</b> Sex:diagnosis interaction effects for cortical thickness AIs. ....                                        | 10 |
| <b>Supplementary Table 8.</b> Sex:diagnosis interaction effects for cortical surface area AIs. ....                                     | 12 |
| <b>Supplementary Table 9.</b> Sex:diagnosis interaction effects for subcortical volume AIs. ....                                        | 14 |
| <b>Supplementary Table 10.</b> Age:diagnosis interaction effects for cortical thickness AIs.. ....                                      | 15 |
| <b>Supplementary Table 11.</b> Age:diagnosis interaction effects for cortical surface area AIs.. ....                                   | 17 |
| <b>Supplementary Table 12.</b> Age:diagnosis interaction effects for subcortical volume AIs.....                                        | 19 |
| <b>Supplementary Table 13.</b> Association of IQ with asymmetry within cases and within controls.....                                   | 20 |
| <b>Supplementary Table 14.</b> Association of log <sub>10</sub> -normalized ADOS severity scores with brain asymmetry within cases..... | 21 |
| <b>Supplementary Table 15</b> Association of medication use with brain asymmetry within cases .....                                     | 22 |

**List of Figures:**

|                                                                                                                                                                            |    |
|----------------------------------------------------------------------------------------------------------------------------------------------------------------------------|----|
| <b>Supplementary Figure 1.</b> Distributions of ADOS severity scores within cases, and of sex, age and IQ in both cases and controls. ....                                 | 23 |
| <b>Supplementary Figure 2.</b> Joyplot of the distributions of AIs in the total sample (without winsorization).....                                                        | 24 |
| <b>Supplementary Figure 3</b> Residual plots of the linear mixed effects model analysis of cortical thickness AIs and the AI of the total average cortical thickness ..... | 25 |
| <b>Supplementary Figure 4.</b> Residual plots of the linear mixed effects model analysis of cortical surface area AIs and the AI of the total cortical surface area. ....  | 26 |
| <b>Supplementary Figure 5.</b> Residual plots of the linear mixed effects model analysis of subcortical volume AIs and the AI of the lateral ventricles.....               | 27 |
| <b>Supplementary Figure 6.</b> Correlations between AIs of cortical thickness.....                                                                                         | 28 |
| <b>Supplementary Figure 7.</b> Correlations between AIs of cortical surface areas.....                                                                                     | 29 |
| <b>Supplementary Figure 8.</b> Correlations between AIs of subcortical volumes. ....                                                                                       | 30 |
| <b>Supplementary Figure 9.</b> Scatter plots of the relationships between age and AIs of the total and regional cortical thicknesses.....                                  | 31 |
| <b>Supplementary Figure 10.</b> Scatter plots of the relationships between age and AIs of the total and regional cortical surface areas. ....                              | 32 |
| <b>Supplementary Figure 11.</b> Scatter plots of the relationships between age and AIs of subcortical volumes and lateral ventricles. ....                                 | 33 |

Supplementary Table S1. Full linear mixed model results for the cortical thickness AIs

| AI region                          | N cases/<br>controls | β-value  |          |          | Standard Error |        |        | t-value |       |       | P-value <sup>1</sup> |                |              | Cohen's <i>d</i> (95% CI) |
|------------------------------------|----------------------|----------|----------|----------|----------------|--------|--------|---------|-------|-------|----------------------|----------------|--------------|---------------------------|
|                                    |                      | diag     | age      | sex      | diag           | age    | sex    | diag    | age   | sex   | diag                 | age            | sex          |                           |
| bankssts thickness                 | 1691/1750            | 0.00009  | 0.00002  | 0.00298  | 0.0014         | 0.0001 | 0.0019 | 0.06    | 0.20  | 1.58  | 0.950                | 0.845          | 0.113        | 0.002(-0.06,0.07)         |
| caudalanteriorcingulate thickness  | 1699/1763            | -0.00004 | -0.00006 | 0.00234  | 0.0018         | 0.0001 | 0.0024 | -0.02   | -0.44 | 0.98  | 0.982                | 0.657          | 0.328        | -0.001(-0.07,0.07)        |
| caudalmiddlefrontal thickness      | 1705/1770            | -0.00166 | 0.00003  | -0.00046 | 0.0010         | 0.0001 | 0.0013 | -1.72   | 0.32  | -0.36 | 0.086                | 0.749          | 0.717        | -0.059(-0.13,0.01)        |
| cuneus thickness                   | 1700/1767            | -0.00215 | 0.00006  | -0.00180 | 0.0012         | 0.0001 | 0.0015 | -1.84   | 0.66  | -1.17 | 0.066                | 0.508          | 0.240        | -0.063(-0.13,0)           |
| entorhinal thickness               | 1688/1752            | 0.00360  | -0.00032 | -0.00190 | 0.0022         | 0.0001 | 0.0028 | 1.67    | -2.17 | -0.68 | 0.095                | <b>0.030</b>   | 0.495        | 0.057(-0.01,0.12)         |
| frontalpole thickness              | 1704/1765            | -0.00069 | -0.00022 | -0.00085 | 0.0023         | 0.0002 | 0.0030 | -0.30   | -1.37 | -0.28 | 0.765                | 0.171          | 0.777        | -0.01(-0.08,0.06)         |
| fusiform thickness                 | 1704/1767            | 0.00277  | -0.00001 | 0.00234  | 0.0009         | 0.0001 | 0.0011 | 3.20    | -0.17 | 2.06  | <b>0.001</b>         | 0.862          | <b>0.040</b> | 0.109(0.04,0.18)          |
| inferiorparietal thickness         | 1705/1769            | -0.00146 | -0.00002 | -0.00089 | 0.0008         | 0.0001 | 0.0010 | -1.85   | -0.28 | -0.86 | 0.065                | 0.782          | 0.392        | -0.063(-0.13,0)           |
| inferiortemporal thickness         | 1703/1768            | 0.00305  | 0.00001  | 0.00098  | 0.0010         | 0.0001 | 0.0014 | 2.97    | 0.07  | 0.73  | <b>0.003</b>         | 0.948          | 0.467        | 0.102(0.03,0.17)          |
| insula thickness                   | 1700/1764            | 0.00107  | 0.00011  | 0.00256  | 0.0009         | 0.0001 | 0.0012 | 1.15    | 1.41  | 2.10  | 0.252                | 0.158          | <b>0.036</b> | 0.039(-0.03,0.11)         |
| isthmuscingulate thickness         | 1699/1769            | -0.00365 | 0.00027  | 0.00186  | 0.0014         | 0.0001 | 0.0018 | -2.58   | 2.81  | 1.02  | <b>0.010</b>         | <b>0.005</b>   | 0.310        | -0.088(-0.16,-0.02)       |
| lateraloccipital thickness         | 1701/1766            | 0.00075  | 0.00009  | 0.00119  | 0.0008         | 0.0001 | 0.0011 | 0.92    | 1.40  | 1.12  | 0.359                | 0.160          | 0.264        | 0.031(-0.04,0.1)          |
| lateralorbitofrontal thickness     | 1704/1771            | 0.00017  | -0.00003 | -0.00066 | 0.0010         | 0.0001 | 0.0014 | 0.16    | -0.33 | -0.48 | 0.872                | 0.739          | 0.631        | 0.006(-0.06,0.07)         |
| lingual thickness                  | 1704/1769            | 0.00051  | 0.00000  | -0.00379 | 0.0010         | 0.0001 | 0.0013 | 0.53    | 0.01  | -3.03 | 0.594                | 0.988          | <b>0.002</b> | 0.018(-0.05,0.08)         |
| medialorbitofrontal thickness      | 1705/1769            | -0.00442 | 0.00043  | -0.00052 | 0.0013         | 0.0001 | 0.0017 | -3.47   | 4.23  | -0.31 | <b>0.001</b>         | <b>0.00002</b> | 0.758        | -0.119(-0.19,-0.05)       |
| middletemporal thickness           | 1702/1764            | -0.00034 | 0.00004  | 0.00106  | 0.0010         | 0.0001 | 0.0013 | -0.35   | 0.47  | 0.84  | 0.726                | 0.641          | 0.403        | -0.012(-0.08,0.05)        |
| paracentral thickness              | 1702/1771            | 0.00114  | 0.00002  | -0.00037 | 0.0010         | 0.0001 | 0.0012 | 1.20    | 0.29  | -0.29 | 0.231                | 0.772          | 0.769        | 0.041(-0.03,0.11)         |
| parahippocampal thickness          | 1702/1764            | -0.00028 | 0.00004  | -0.00264 | 0.0016         | 0.0001 | 0.0020 | -0.18   | 0.36  | -1.31 | 0.856                | 0.717          | 0.190        | -0.006(-0.07,0.06)        |
| parsopercularis thickness          | 1703/1769            | -0.00059 | 0.00001  | 0.00083  | 0.0010         | 0.0001 | 0.0014 | -0.57   | 0.13  | 0.61  | 0.568                | 0.898          | 0.540        | -0.02(-0.09,0.05)         |
| parsorbitalis thickness            | 1705/1770            | -0.00348 | 0.00005  | 0.00139  | 0.0015         | 0.0001 | 0.0020 | -2.26   | 0.43  | 0.69  | <b>0.024</b>         | 0.670          | 0.491        | -0.077(-0.14,-0.01)       |
| parstriangularis thickness         | 1703/1769            | -0.00035 | -0.00009 | 0.00144  | 0.0011         | 0.0001 | 0.0015 | -0.31   | -0.98 | 0.96  | 0.759                | 0.330          | 0.336        | -0.011(-0.08,0.06)        |
| pericalcarine thickness            | 1699/1768            | -0.00086 | -0.00013 | 0.00063  | 0.0014         | 0.0001 | 0.0018 | -0.62   | -1.12 | 0.34  | 0.536                | 0.262          | 0.731        | -0.021(-0.09,0.05)        |
| postcentral thickness              | 1704/1766            | -0.00107 | 0.00007  | -0.00040 | 0.0009         | 0.0001 | 0.0011 | -1.25   | 1.16  | -0.36 | 0.211                | 0.245          | 0.720        | -0.043(-0.11,0.02)        |
| posteriorcingulate thickness       | 1706/1765            | -0.00251 | 0.00007  | -0.00079 | 0.0012         | 0.0001 | 0.0015 | -2.13   | 0.80  | -0.51 | <b>0.034</b>         | 0.423          | 0.611        | -0.073(-0.14,-0.01)       |
| precentral thickness               | 1704/1766            | -0.00045 | -0.00009 | -0.00038 | 0.0007         | 0.0001 | 0.0010 | -0.60   | -1.52 | -0.39 | 0.547                | 0.129          | 0.700        | -0.021(-0.09,0.05)        |
| precuneus thickness                | 1705/1769            | -0.00027 | 0.00005  | -0.00188 | 0.0007         | 0.0001 | 0.0010 | -0.37   | 0.81  | -1.96 | 0.710                | 0.418          | 0.050        | -0.013(-0.08,0.05)        |
| rostralanteriorcingulate thickness | 1700/1765            | -0.00568 | -0.00010 | 0.00321  | 0.0017         | 0.0001 | 0.0022 | -3.37   | -0.69 | 1.45  | <b>0.001</b>         | 0.491          | 0.147        | -0.116(-0.18,-0.05)       |
| rostralmiddlefrontal thickness     | 1707/1769            | -0.00255 | -0.00022 | 0.00169  | 0.0009         | 0.0001 | 0.0011 | -2.94   | -2.87 | 1.47  | <b>0.003</b>         | <b>0.004</b>   | 0.141        | -0.101(-0.17,-0.03)       |
| superiorfrontal thickness          | 1706/1771            | -0.00251 | 0.00003  | -0.00116 | 0.0006         | 0.0001 | 0.0008 | -3.92   | 0.48  | -1.38 | <b>0.0001</b>        | 0.630          | 0.169        | -0.134(-0.2,-0.07)        |
| superiorparietal thickness         | 1702/1769            | 0.00023  | 0.00005  | -0.00001 | 0.0007         | 0.0001 | 0.0009 | 0.35    | 0.89  | -0.01 | 0.725                | 0.372          | 0.995        | 0.012(-0.05,0.08)         |
| superiortemporal thickness         | 1693/1760            | -0.00168 | 0.00003  | 0.00177  | 0.0009         | 0.0001 | 0.0011 | -1.97   | 0.47  | 1.59  | <b>0.049</b>         | 0.635          | 0.112        | -0.068(-0.13,0)           |
| supramarginal thickness            | 1698/1769            | 0.00002  | -0.00009 | 0.00187  | 0.0009         | 0.0001 | 0.0011 | 0.03    | -1.35 | 1.63  | 0.980                | 0.177          | 0.103        | 0.001(-0.07,0.07)         |
| temporalpole thickness             | 1697/1761            | 0.00300  | -0.00002 | 0.00052  | 0.0020         | 0.0002 | 0.0026 | 1.49    | -0.12 | 0.20  | 0.136                | 0.906          | 0.844        | 0.051(-0.02,0.12)         |
| transversetemporal thickness       | 1704/1771            | 0.00152  | 0.00025  | 0.00107  | 0.0017         | 0.0001 | 0.0022 | 0.91    | 1.95  | 0.49  | 0.364                | 0.051          | 0.626        | 0.031(-0.04,0.1)          |
| Total average thickness            | 1706/1771            | -0.00061 | 0.00001  | 0.00021  | 0.0003         | 0.0000 | 0.0004 | -1.96   | 0.33  | 0.52  | 0.050                | 0.742          | 0.602        | -0.067(-0.13,0)           |

<sup>1</sup>Unadjusted *P* values are shown, with in **bold** those that are significant (*P* < 0.05) at the uncorrected level. Those *p*-values for diagnosis that survived multiple testing correction (FDR < 0.05) are indicated in *italic*.

**Supplementary Table 2. Full linear mixed model results for the cortical surface area AIs.**

| AI region                             | N cases/<br>controls | $\beta$ -value |          |          | Standard Error |        |        | t-value |       |       | P-value <sup>1</sup> |                 |       | Cohen's <i>d</i> (95% CI) |
|---------------------------------------|----------------------|----------------|----------|----------|----------------|--------|--------|---------|-------|-------|----------------------|-----------------|-------|---------------------------|
|                                       |                      | diag           | age      | sex      | diag           | age    | sex    | diag    | age   | sex   | diag                 | age             | sex   |                           |
| bankssts surface area                 | 1685/1745            | 0.00292        | -0.00081 | -0.00133 | 0.0030         | 0.0002 | 0.0038 | 0.97    | -4.69 | -0.35 | 0.332                | <b>0.000003</b> | 0.729 | 0.033(-0.03,0.1)          |
| caudalanteriorcingulate surface area  | 1701/1752            | -0.00176       | -0.00043 | 0.00742  | 0.0040         | 0.0002 | 0.0052 | -0.44   | -1.73 | 1.43  | 0.662                | 0.084           | 0.151 | -0.015(-0.08,0.05)        |
| caudalmiddlefrontal surface area      | 1704/1763            | -0.00186       | 0.00010  | 0.00642  | 0.0027         | 0.0002 | 0.0034 | -0.70   | 0.65  | 1.89  | 0.483                | 0.516           | 0.059 | -0.024(-0.09,0.04)        |
| cuneus surface area                   | 1700/1754            | -0.00303       | 0.00000  | -0.00212 | 0.0024         | 0.0002 | 0.0032 | -1.24   | 0.00  | -0.66 | 0.215                | 0.998           | 0.506 | -0.043(-0.11,0.02)        |
| entorhinal surface area               | 1687/1733            | -0.00687       | 0.00054  | -0.00009 | 0.0043         | 0.0003 | 0.0055 | -1.61   | 1.96  | -0.02 | 0.108                | 0.050           | 0.986 | -0.055(-0.12,0.01)        |
| frontalpole surface area              | 1707/1757            | 0.00276        | 0.00014  | 0.00351  | 0.0032         | 0.0002 | 0.0042 | 0.86    | 0.58  | 0.84  | 0.388                | 0.560           | 0.400 | 0.03(-0.04,0.1)           |
| fusiform surface area                 | 1702/1760            | -0.00477       | 0.00007  | 0.00416  | 0.0018         | 0.0001 | 0.0024 | -2.58   | 0.56  | 1.74  | <b>0.010</b>         | 0.574           | 0.082 | -0.089(-0.16,-0.02)       |
| inferioparietal surface area          | 1705/1758            | 0.00034        | -0.00009 | 0.00072  | 0.0019         | 0.0001 | 0.0024 | 0.18    | -0.74 | 0.30  | 0.857                | 0.461           | 0.767 | 0.006(-0.06,0.07)         |
| inferiortemporal surface area         | 1698/1757            | -0.00114       | 0.00006  | -0.00066 | 0.0021         | 0.0001 | 0.0027 | -0.55   | 0.45  | -0.24 | 0.585                | 0.654           | 0.807 | -0.019(-0.09,0.05)        |
| insula surface area                   | 1699/1751            | 0.00063        | -0.00004 | -0.00279 | 0.0016         | 0.0001 | 0.0022 | 0.38    | -0.34 | -1.29 | 0.701                | 0.733           | 0.197 | 0.013(-0.05,0.08)         |
| isthmuscingulate surface area         | 1699/1753            | 0.00134        | 0.00006  | 0.00048  | 0.0026         | 0.0002 | 0.0034 | 0.51    | 0.34  | 0.14  | 0.611                | 0.734           | 0.888 | 0.017(-0.05,0.08)         |
| lateraloccipital surface area         | 1705/1754            | -0.00080       | -0.00009 | 0.00298  | 0.0018         | 0.0001 | 0.0023 | -0.45   | -0.80 | 1.30  | 0.654                | 0.424           | 0.193 | -0.015(-0.08,0.05)        |
| lateralorbitofrontal surface area     | 1701/1762            | -0.00500       | 0.00010  | -0.00013 | 0.0015         | 0.0001 | 0.0020 | -3.28   | 0.81  | -0.07 | <b>0.001</b>         | 0.421           | 0.946 | -0.112(-0.18,-0.05)       |
| lingual surface area                  | 1696/1758            | 0.00046        | 0.00017  | 0.00286  | 0.0020         | 0.0001 | 0.0026 | 0.23    | 1.14  | 1.08  | 0.820                | 0.252           | 0.279 | 0.008(-0.06,0.07)         |
| medialorbitofrontal surface area      | 1704/1763            | 0.00675        | -0.00005 | -0.00243 | 0.0021         | 0.0002 | 0.0028 | 3.17    | -0.27 | -0.87 | <b>0.002</b>         | 0.787           | 0.385 | 0.109(0.04,0.18)          |
| middletemporal surface area           | 1698/1757            | -0.00073       | -0.00007 | 0.00166  | 0.0017         | 0.0001 | 0.0021 | -0.44   | -0.64 | 0.77  | 0.661                | 0.522           | 0.441 | -0.015(-0.08,0.05)        |
| paracentral surface area              | 1703/1762            | 0.00408        | -0.00018 | 0.00104  | 0.0023         | 0.0001 | 0.0029 | 1.81    | -1.29 | 0.36  | 0.071                | 0.195           | 0.720 | 0.062(0.0,0.13)           |
| parahippocampal surface area          | 1692/1752            | -0.00051       | -0.00008 | 0.00168  | 0.0028         | 0.0002 | 0.0036 | -0.19   | -0.47 | 0.47  | 0.853                | 0.639           | 0.637 | -0.006(-0.07,0.06)        |
| parsopercularis surface area          | 1704/1752            | 0.00042        | 0.00016  | 0.00050  | 0.0028         | 0.0002 | 0.0036 | 0.15    | 1.00  | 0.14  | 0.880                | 0.317           | 0.890 | 0.005(-0.06,0.07)         |
| parsorbitalis surface area            | 1699/1760            | 0.00321        | 0.00008  | 0.00054  | 0.0021         | 0.0001 | 0.0028 | 1.50    | 0.60  | 0.20  | 0.133                | 0.551           | 0.844 | 0.052(-0.02,0.12)         |
| parstriangularis surface area         | 1702/1758            | 0.00024        | -0.00018 | 0.00459  | 0.0027         | 0.0002 | 0.0035 | 0.09    | -1.02 | 1.32  | 0.929                | 0.309           | 0.188 | 0.003(-0.06,0.07)         |
| pericalcarine surface area            | 1699/1762            | -0.00134       | -0.00004 | 0.00129  | 0.0023         | 0.0002 | 0.0030 | -0.58   | -0.22 | 0.43  | 0.561                | 0.825           | 0.670 | -0.02(-0.09,0.05)         |
| postcentral surface area              | 1706/1759            | 0.00135        | 0.00002  | 0.00082  | 0.0017         | 0.0001 | 0.0022 | 0.79    | 0.18  | 0.37  | 0.430                | 0.855           | 0.709 | 0.027(-0.04,0.09)         |
| posteriorcingulate surface area       | 1703/1758            | -0.00189       | -0.00023 | 0.00406  | 0.0026         | 0.0002 | 0.0034 | -0.72   | -1.41 | 1.20  | 0.475                | 0.160           | 0.232 | -0.025(-0.09,0.04)        |
| precentral surface area               | 1703/1757            | -0.00203       | -0.00012 | -0.00102 | 0.0014         | 0.0001 | 0.0018 | -1.43   | -1.38 | -0.56 | 0.154                | 0.168           | 0.578 | -0.049(-0.12,0.02)        |
| precuneus surface area                | 1702/1762            | -0.00017       | 0.00009  | 0.00038  | 0.0016         | 0.0001 | 0.0020 | -0.11   | 1.02  | 0.19  | 0.915                | 0.310           | 0.851 | -0.004(-0.07,0.06)        |
| rostralanteriorcingulate surface area | 1701/1760            | -0.00344       | 0.00009  | 0.00583  | 0.0034         | 0.0003 | 0.0045 | -1.00   | 0.36  | 1.30  | 0.317                | 0.719           | 0.193 | -0.034(-0.1,0.03)         |
| rostralmiddlefrontal surface area     | 1705/1761            | 0.00061        | 0.00000  | -0.00140 | 0.0016         | 0.0001 | 0.0020 | 0.39    | 0.01  | -0.69 | 0.694                | 0.990           | 0.489 | 0.013(-0.05,0.08)         |
| superiorfrontal surface area          | 1710/1763            | 0.00071        | -0.00009 | -0.00168 | 0.0012         | 0.0001 | 0.0016 | 0.57    | -1.18 | -1.05 | 0.569                | 0.240           | 0.294 | 0.019(-0.05,0.09)         |
| superiorparietal surface area         | 1702/1763            | -0.00065       | 0.00002  | -0.00233 | 0.0016         | 0.0001 | 0.0021 | -0.40   | 0.16  | -1.12 | 0.688                | 0.873           | 0.263 | -0.014(-0.08,0.05)        |
| superiortemporal surface area         | 1691/1750            | -0.00145       | -0.00004 | -0.00152 | 0.0015         | 0.0001 | 0.0020 | -0.96   | -0.34 | -0.77 | 0.339                | 0.733           | 0.440 | -0.033(-0.1,0.03)         |
| supramarginal surface area            | 1698/1759            | 0.00013        | -0.00003 | -0.00519 | 0.0022         | 0.0002 | 0.0029 | 0.06    | -0.21 | -1.80 | 0.954                | 0.831           | 0.072 | 0.002(-0.06,0.07)         |
| temporalpole surface area             | 1705/1751            | 0.00191        | 0.00050  | 0.00262  | 0.0030         | 0.0002 | 0.0039 | 0.65    | 2.29  | 0.68  | 0.517                | <b>0.022</b>    | 0.497 | 0.022(-0.04,0.09)         |
| transversetemporal surface area       | 1704/1757            | 0.00046        | -0.00023 | -0.00068 | 0.0028         | 0.0002 | 0.0036 | 0.16    | -1.23 | -0.19 | 0.870                | 0.219           | 0.850 | 0.006(-0.06,0.07)         |
| Total surface area                    | 1706/1763            | -0.00037       | -0.00002 | 0.00008  | 0.0004         | 0.0000 | 0.0005 | -0.95   | -0.71 | 0.16  | 0.344                | 0.480           | 0.876 | -0.032(-0.1,0.03)         |

<sup>1</sup>Unadjusted *P* values are shown, with in **bold** those that are significant (*P* < 0.05) at the uncorrected level. Those *p*-values for diagnosis that survived multiple testing correction (FDR < 0.05) are indicated in *italic*.

**Supplementary Table 3. Full linear mixed model results for the subcortical volume AIs.**

| AI region        | N cases/<br>controls | $\beta$ -value |          |          | Standard Error |        |        | t-value |       |       | P-value <sup>1</sup> |                             |       | Cohen's <i>d</i> (95% CI) |
|------------------|----------------------|----------------|----------|----------|----------------|--------|--------|---------|-------|-------|----------------------|-----------------------------|-------|---------------------------|
|                  |                      | diag           | age      | sex      | diag           | age    | sex    | diag    | age   | sex   | diag                 | age                         | sex   |                           |
| Accumbens        | 1716/1762            | -0.00220       | -0.00026 | -0.00022 | 0.0028         | 0.0002 | 0.0036 | -0.80   | -1.09 | -0.06 | 0.425                | 0.276                       | 0.952 | -0.027(-0.09,0.04)        |
| Amygdala         | 1709/1768            | 0.00018        | 0.00002  | 0.00513  | 0.0022         | 0.0002 | 0.0029 | 0.08    | 0.13  | 1.77  | 0.934                | 0.893                       | 0.077 | 0.003(-0.06,0.07)         |
| CaudateNucleus   | 1711/1763            | 0.00293        | 0.00031  | 0.00223  | 0.0013         | 0.0001 | 0.0017 | 2.24    | 2.70  | 1.29  | <b>0.025</b>         | <b>0.007</b>                | 0.196 | 0.077(0.01,0.14)          |
| GlobusPallidus   | 1707/1761            | 0.00113        | -0.00053 | 0.00107  | 0.0021         | 0.0002 | 0.0028 | 0.53    | -2.88 | 0.38  | 0.593                | <b>0.004</b>                | 0.702 | 0.018(-0.05,0.08)         |
| Hippocampus      | 1708/1762            | -0.00106       | 0.00002  | -0.00017 | 0.0015         | 0.0001 | 0.0020 | -0.70   | 0.14  | -0.08 | 0.485                | 0.885                       | 0.934 | -0.024(-0.09,0.04)        |
| LateralVentricle | 1660/1727            | -0.00169       | -0.00016 | 0.00306  | 0.0051         | 0.0003 | 0.0065 | -0.33   | -0.52 | 0.47  | 0.741                | 0.601                       | 0.637 | -0.011(-0.08,0.06)        |
| Putamen          | 1712/1763            | 0.00395        | 0.00049  | 0.00273  | 0.0012         | 0.0001 | 0.0015 | 3.40    | 5.03  | 1.77  | <b>0.001</b>         | <b>5.2·10<sup>-7</sup></b>  | 0.076 | 0.116(0.05,0.18)          |
| Thalamus         | 1690/1763            | 0.00126        | 0.00063  | 0.00255  | 0.0011         | 0.0001 | 0.0015 | 1.15    | 6.36  | 1.75  | 0.252                | <b>2.3·10<sup>-10</sup></b> | 0.081 | 0.039(-0.03,0.11)         |

<sup>1</sup>Unadjusted *P* values are shown, with in **bold** those that are significant ( $P < 0.05$ ) at the uncorrected level. Those *p*-values for diagnosis that survived multiple testing correction (FDR < 0.05) are indicated in *italic*.

**Supplementary Table 4. Results of sensitivity analyses for cortical thickness AIs.** Results are shown (1) after outliers were winsorized, (2) after a non-linear effect of age was added to the model, (3) after examining the subset of 3T acquired data, (4) after removing subjects below 6 year of age, and (5) after removing subjects aged 40 years or older.

| AI region                          | winsorised     |        | non-linear age |       | 3T                         |       | age $\geq$ 6y              |       | age < 40y                  |       |
|------------------------------------|----------------|--------|----------------|-------|----------------------------|-------|----------------------------|-------|----------------------------|-------|
|                                    | p <sup>1</sup> | d      | p <sup>1</sup> | d     | p <sup>1</sup>             | d     | p <sup>1</sup>             | d     | p <sup>1</sup>             | d     |
| bankssts thickness                 | 0.956          | 0.002  | 0.978          | 0.00  | 0.762                      | 0.01  | 0.849                      | 0.01  | 0.952                      | 0.00  |
| caudalanteriorcingulate thickness  | 0.986          | -0.001 | 0.965          | 0.00  | 0.578                      | 0.02  | 0.769                      | 0.01  | 0.867                      | -0.01 |
| caudalmiddlefrontal thickness      | 0.077          | -0.06  | 0.090          | -0.06 | 0.210                      | -0.05 | 0.149                      | -0.05 | 0.149                      | -0.05 |
| cuneus thickness                   | 0.067          | -0.06  | 0.065          | -0.06 | 0.068                      | -0.07 | 0.093                      | -0.06 | 0.066                      | -0.06 |
| entorhinal thickness               | 0.091          | 0.06   | 0.103          | 0.06  | 0.287                      | 0.04  | 0.184                      | 0.05  | 0.096                      | 0.06  |
| frontalpole thickness              | 0.761          | -0.01  | 0.747          | -0.01 | 0.979                      | 0.00  | 0.914                      | 0.00  | 0.786                      | -0.01 |
| fusiform thickness                 | <b>0.002</b>   | 0.11   | <b>0.002</b>   | 0.11  | <b>0.006</b>               | 0.10  | <b>0.004</b>               | 0.10  | <b>0.002</b>               | 0.11  |
| inferiorparietal thickness         | 0.052          | -0.07  | 0.059          | -0.06 | 0.131                      | -0.06 | 0.091                      | -0.06 | <b>0.039</b>               | -0.07 |
| inferiortemporal thickness         | <b>0.003</b>   | 0.10   | <b>0.003</b>   | 0.10  | <b>0.016</b>               | 0.09  | <b>0.004</b>               | 0.10  | <b>0.002</b>               | 0.11  |
| insula thickness                   | 0.259          | 0.04   | 0.262          | 0.04  | 0.303                      | 0.04  | 0.231                      | 0.04  | 0.224                      | 0.04  |
| isthmuscingulate thickness         | <b>0.010</b>   | -0.09  | <b>0.010</b>   | -0.09 | 0.096                      | -0.06 | <b>0.015</b>               | -0.09 | <b>0.006</b>               | -0.10 |
| lateraloccipital thickness         | 0.355          | 0.03   | 0.368          | 0.03  | 0.459                      | 0.03  | 0.308                      | 0.04  | 0.462                      | 0.03  |
| lateralorbitofrontal thickness     | 0.980          | 0.00   | 0.855          | 0.01  | 0.874                      | -0.01 | 0.944                      | 0.00  | 0.996                      | 0.00  |
| lingual thickness                  | 0.625          | 0.02   | 0.607          | 0.02  | 0.316                      | 0.04  | 0.759                      | 0.01  | 0.633                      | 0.02  |
| medialorbitofrontal thickness      | <b>0.001</b>   | -0.12  | <b>0.001</b>   | -0.12 | <b>4.5·10<sup>-4</sup></b> | -0.13 | <b>3.1·10<sup>-4</sup></b> | -0.13 | <b>3.2·10<sup>-4</sup></b> | -0.13 |
| middletemporal thickness           | 0.684          | -0.01  | 0.721          | -0.01 | 0.530                      | -0.02 | 0.410                      | -0.03 | 0.829                      | -0.01 |
| paracentral thickness              | 0.204          | 0.04   | 0.231          | 0.04  | 0.116                      | 0.06  | 0.247                      | 0.04  | 0.325                      | 0.03  |
| parahippocampal thickness          | 0.866          | -0.01  | 0.835          | -0.01 | 0.740                      | -0.01 | 0.940                      | 0.00  | 0.930                      | 0.00  |
| parsopercularis thickness          | 0.582          | -0.02  | 0.584          | -0.02 | 0.583                      | -0.02 | 0.601                      | -0.02 | 0.566                      | -0.02 |
| parsorbitalis thickness            | <b>0.024</b>   | -0.08  | <b>0.024</b>   | -0.08 | <b>0.015</b>               | -0.09 | <b>0.021</b>               | -0.08 | <b>0.021</b>               | -0.08 |
| parstriangularis thickness         | 0.746          | -0.01  | 0.777          | -0.01 | 0.746                      | -0.01 | 0.705                      | -0.01 | 0.682                      | -0.01 |
| pericalcarine thickness            | 0.544          | -0.02  | 0.540          | -0.02 | 0.854                      | 0.01  | 0.829                      | -0.01 | 0.508                      | -0.02 |
| postcentral thickness              | 0.205          | -0.04  | 0.197          | -0.04 | 0.384                      | -0.03 | 0.309                      | -0.04 | 0.193                      | -0.05 |
| posteriorcingulate thickness       | 0.043          | -0.07  | <b>0.036</b>   | -0.07 | 0.123                      | -0.06 | <b>0.016</b>               | -0.09 | <b>0.023</b>               | -0.08 |
| precentral thickness               | 0.482          | -0.02  | 0.535          | -0.02 | 0.763                      | -0.01 | 0.701                      | -0.01 | 0.774                      | -0.01 |
| precuneus thickness                | 0.744          | -0.01  | 0.711          | -0.01 | 0.931                      | 0.00  | 0.858                      | -0.01 | 0.638                      | -0.02 |
| rostralanteriorcingulate thickness | <b>0.001</b>   | -0.12  | <b>0.001</b>   | -0.12 | <b>8.7·10<sup>-5</sup></b> | -0.15 | <b>4.3·10<sup>-4</sup></b> | -0.12 | <b>3.3·10<sup>-4</sup></b> | -0.13 |

| AI region                      | winsorised                        |          | non-linear age                  |          | 3T                                |          | age ≥ 6y                          |          | age < 40y                         |          |
|--------------------------------|-----------------------------------|----------|---------------------------------|----------|-----------------------------------|----------|-----------------------------------|----------|-----------------------------------|----------|
|                                | <i>P</i> <sup>1</sup>             | <i>d</i> | <i>P</i> <sup>1</sup>           | <i>d</i> | <i>P</i> <sup>1</sup>             | <i>d</i> | <i>P</i> <sup>1</sup>             | <i>d</i> | <i>P</i> <sup>1</sup>             | <i>d</i> |
| rostralmiddlefrontal thickness | <b>0.003</b>                      | -0.10    | <b>0.004</b>                    | -0.10    | <b>0.001</b>                      | -0.12    | <b>0.001</b>                      | -0.12    | <b>0.005</b>                      | -0.10    |
| superiorfrontal thickness      | <b><i>8.7·10<sup>-5</sup></i></b> | -0.13    | <b><i>1·10<sup>-4</sup></i></b> | -0.13    | <b><i>7.4·10<sup>-6</sup></i></b> | -0.17    | <b><i>5.9·10<sup>-5</sup></i></b> | -0.14    | <b><i>7.2·10<sup>-5</sup></i></b> | -0.14    |
| superiorparietal thickness     | 0.736                             | 0.01     | 0.740                           | 0.01     | 0.498                             | 0.03     | 0.663                             | 0.02     | 0.586                             | 0.02     |
| superiortemporal thickness     | <b>0.049</b>                      | -0.07    | <b>0.049</b>                    | -0.07    | <b>0.004</b>                      | -0.11    | 0.051                             | -0.07    | 0.058                             | -0.07    |
| supramarginal thickness        | 0.971                             | 0.001    | 0.972                           | 0.00     | 0.912                             | 0.00     | 0.816                             | 0.01     | 0.976                             | 0.00     |
| temporalpole thickness         | 0.137                             | 0.05     | 0.137                           | 0.05     | 0.226                             | 0.05     | 0.117                             | 0.06     | 0.082                             | 0.06     |
| transversetemporal thickness   | 0.374                             | 0.03     | 0.375                           | 0.03     | 0.504                             | 0.03     | 0.701                             | 0.01     | 0.303                             | 0.04     |
| Total average thickness        | 0.051                             | -0.07    | <b>0.050</b>                    | -0.07    | <b>0.039</b>                      | -0.08    | <b>0.045</b>                      | -0.07    | 0.052                             | -0.07    |

<sup>1</sup>Unadjusted *P* values are shown, with in **bold** those that are significant (*P* < 0.05) at the uncorrected level. Those *p*-values for diagnosis that survived multiple testing correction (FDR < 0.05) are indicated in *italic*.

**Supplementary Table 5. Results of sensitivity analyses for cortical surface area AIs.** Results are shown (1) after outliers were winsorized, (2) after a non-linear effect of age was added to the model, (3) after examining the subset of 3T acquired data, (4) after removing subjects below 6 year of age, and (5) after removing subjects aged 40 year or older.

| AI region                            | winsorised     |       | non-linear age |       | 3T             |       | age $\geq$ 6y  |       | age < 40y      |       |
|--------------------------------------|----------------|-------|----------------|-------|----------------|-------|----------------|-------|----------------|-------|
|                                      | P <sup>1</sup> | d     | P <sup>1</sup> | d     | P <sup>1</sup> | d     | P <sup>1</sup> | d     | P <sup>1</sup> | d     |
| bankssts surface area                | 0.311          | 0.04  | 0.356          | 0.03  | 0.590          | 0.02  | 0.454          | 0.03  | 0.357          | 0.03  |
| caudalanteriorcingulate surface area | 0.543          | -0.02 | 0.643          | -0.02 | 0.818          | 0.01  | 0.886          | -0.01 | 0.636          | -0.02 |
| caudalmiddlefrontal surface area     | 0.418          | -0.03 | 0.500          | -0.02 | 0.328          | -0.04 | 0.232          | -0.04 | 0.471          | -0.03 |
| cuneus surface area                  | 0.222          | -0.04 | 0.232          | -0.04 | 0.130          | -0.06 | 0.309          | -0.04 | 0.128          | -0.05 |
| entorhinal surface area              | 0.117          | -0.05 | 0.108          | -0.06 | <b>0.029</b>   | -0.08 | 0.118          | -0.06 | 0.153          | -0.05 |
| frontalpole surface area             | 0.410          | 0.03  | 0.408          | 0.03  | 0.107          | 0.06  | 0.692          | 0.01  | 0.366          | 0.03  |
| fusiform surface area                | <b>0.011</b>   | -0.09 | <b>0.010</b>   | -0.09 | <b>0.001</b>   | -0.13 | <b>0.002</b>   | -0.11 | <b>0.007</b>   | -0.09 |
| inferiorparietal surface area        | 0.857          | 0.01  | 0.874          | 0.01  | 0.905          | 0.00  | 0.811          | -0.01 | 0.961          | 0.00  |
| inferiortemporal surface area        | 0.594          | -0.02 | 0.591          | -0.02 | 0.519          | -0.02 | 0.773          | -0.01 | 0.420          | -0.03 |
| insula surface area                  | 0.675          | 0.01  | 0.703          | 0.01  | 0.508          | 0.03  | 0.592          | 0.02  | 0.741          | 0.01  |
| isthmuscingulate surface area        | 0.514          | 0.02  | 0.661          | 0.02  | 0.549          | 0.02  | 0.752          | 0.01  | 0.534          | 0.02  |
| lateraloccipital surface area        | 0.667          | -0.02 | 0.620          | -0.02 | 0.505          | 0.03  | 0.841          | -0.01 | 0.776          | -0.01 |
| lateralorbitofrontal surface area    | <b>0.001</b>   | -0.11 | <b>0.001</b>   | -0.11 | <b>0.001</b>   | -0.12 | <b>0.001</b>   | -0.12 | <b>0.001</b>   | -0.12 |
| lingual surface area                 | 0.762          | 0.01  | 0.822          | 0.01  | 0.744          | 0.01  | 0.934          | 0.00  | 0.721          | 0.01  |
| medialorbitofrontal surface area     | <b>0.003</b>   | 0.10  | <b>0.002</b>   | 0.11  | <b>0.001</b>   | 0.12  | <b>0.002</b>   | 0.11  | <b>0.001</b>   | 0.12  |
| middletemporal surface area          | 0.682          | -0.01 | 0.672          | -0.01 | 0.647          | -0.02 | 0.850          | -0.01 | 0.628          | -0.02 |
| paracentral surface area             | 0.070          | 0.06  | 0.065          | 0.06  | <b>0.047</b>   | 0.07  | <b>0.048</b>   | 0.07  | 0.102          | 0.06  |
| parahippocampal surface area         | 0.808          | -0.01 | 0.839          | -0.01 | 0.960          | 0.00  | 0.947          | 0.00  | 0.620          | -0.02 |
| parsopercularis surface area         | 0.895          | 0.01  | 0.932          | 0.00  | 0.945          | 0.00  | 0.740          | 0.01  | 0.680          | 0.01  |
| parsorbitalis surface area           | 0.143          | 0.05  | 0.144          | 0.05  | 0.207          | 0.05  | 0.099          | 0.06  | 0.196          | 0.05  |
| parstriangularis surface area        | 0.932          | 0.00  | 0.963          | 0.00  | 0.549          | -0.02 | 0.992          | 0.00  | 0.668          | 0.02  |
| pericalcarine surface area           | 0.584          | -0.02 | 0.562          | -0.02 | 0.220          | -0.05 | 0.476          | -0.03 | 0.557          | -0.02 |
| postcentral surface area             | 0.437          | 0.03  | 0.439          | 0.03  | 0.763          | 0.01  | 0.415          | 0.03  | 0.486          | 0.02  |
| posteriorcingulate surface area      | 0.466          | -0.03 | 0.448          | -0.03 | 0.808          | -0.01 | 0.683          | -0.01 | 0.486          | -0.02 |



| AI region                             | winsorised            |          | non-linear age        |          | 3T                    |          | age ≥ 6y              |          | age < 40y             |          |
|---------------------------------------|-----------------------|----------|-----------------------|----------|-----------------------|----------|-----------------------|----------|-----------------------|----------|
|                                       | <i>p</i> <sup>1</sup> | <i>d</i> | <i>p</i> <sup>1</sup> | <i>d</i> | <i>p</i> <sup>1</sup> | <i>d</i> | <i>p</i> <sup>1</sup> | <i>d</i> | <i>p</i> <sup>1</sup> | <i>d</i> |
| precentral surface area               | 0.150                 | -0.05    | 0.149                 | -0.05    | <b>0.030</b>          | -0.08    | 0.059                 | -0.07    | 0.145                 | -0.05    |
| precuneus surface area                | 0.950                 | 0.00     | 0.935                 | 0.00     | 0.674                 | -0.02    | 0.601                 | -0.02    | 0.978                 | 0.00     |
| rostralanteriorcingulate surface area | 0.329                 | -0.03    | 0.314                 | -0.03    | 0.323                 | -0.04    | 0.242                 | -0.04    | 0.245                 | -0.04    |
| rostralmiddlefrontal surface area     | 0.641                 | 0.02     | 0.697                 | 0.01     | 0.550                 | 0.02     | 0.805                 | 0.01     | 0.644                 | 0.02     |
| superiorfrontal surface area          | 0.670                 | 0.02     | 0.511                 | 0.02     | 0.986                 | 0.00     | 0.681                 | 0.01     | 0.411                 | 0.03     |
| superiorparietal surface area         | 0.717                 | -0.01    | 0.635                 | -0.02    | 0.779                 | -0.01    | 0.726                 | -0.01    | 0.609                 | -0.02    |
| superiortemporal surface area         | 0.356                 | -0.03    | 0.314                 | -0.03    | 0.215                 | -0.05    | 0.320                 | -0.04    | 0.603                 | -0.02    |
| supramarginal surface area            | 0.963                 | 0.00     | 0.992                 | 0.00     | 0.475                 | 0.03     | 0.849                 | 0.01     | 0.803                 | 0.01     |
| temporalpole surface area             | 0.555                 | 0.02     | 0.510                 | 0.02     | 0.840                 | 0.01     | 0.639                 | 0.02     | 0.497                 | 0.02     |
| transversetemporal surface area       | 0.887                 | 0.01     | 0.864                 | 0.01     | 0.937                 | 0.00     | 0.901                 | 0.00     | 0.906                 | 0.00     |
| totalsurf                             | 0.431                 | -0.03    | 0.321                 | -0.03    | 0.196                 | -0.05    | 0.244                 | -0.04    | 0.411                 | -0.03    |

<sup>1</sup>Unadjusted *P* values are shown, with in **bold** those that are significant ( $P < 0.05$ ) at the uncorrected level. Those *p*-values for diagnosis that survived multiple testing correction (FDR < 0.05) are indicated in *italic*.

**Supplementary Table 6. Results of sensitivity analyses in subcortical volume AIs.** Results are shown (1) after outliers were winsorized, (2) after a non-linear effect of age was added to the model, (3) after examining the subset of 3T acquired data, (4) after removing subjects below 6 year of age, and (5) after removing subjects aged 40 year or older.

| AI region        | winsorised            |          | non-linear age        |          | 3T                    |          | age $\geq$ 6y         |          | age < 40y             |          |
|------------------|-----------------------|----------|-----------------------|----------|-----------------------|----------|-----------------------|----------|-----------------------|----------|
|                  | <i>p</i> <sup>1</sup> | <i>d</i> | <i>p</i> <sup>1</sup> | <i>d</i> | <i>p</i> <sup>1</sup> | <i>d</i> | <i>p</i> <sup>1</sup> | <i>d</i> | <i>p</i> <sup>1</sup> | <i>d</i> |
| Accumbens        | 0.386                 | -0.030   | 0.445                 | -0.026   | 0.560                 | -0.022   | 0.271                 | -0.039   | 0.544                 | -0.021   |
| Amygdala         | 0.896                 | 0.004    | 0.921                 | 0.003    | 0.753                 | 0.012    | 0.935                 | -0.003   | 0.765                 | -0.010   |
| CaudateNucleus   | <b>0.035</b>          | 0.072    | <b>0.027</b>          | 0.076    | <b>0.008</b>          | 0.099    | 0.014                 | 0.086    | 0.031                 | 0.075    |
| GlobusPallidus   | 0.666                 | 0.015    | 0.640                 | 0.016    | 0.300                 | 0.039    | 0.446                 | 0.027    | 0.844                 | 0.007    |
| Hippocampus      | 0.527                 | -0.022   | 0.504                 | -0.023   | 0.233                 | -0.044   | 0.455                 | -0.026   | 0.535                 | -0.022   |
| LateralVentricle | 0.741                 | -0.011   | 0.711                 | -0.013   | 0.988                 | -0.001   | 0.672                 | -0.015   | 0.759                 | -0.011   |
| Putamen*         | <b>0.001</b>          | 0.118    | <b>0.001</b>          | 0.117    | <b>0.001</b>          | 0.125    | <b>0.001</b>          | 0.121    | <b>0.002</b>          | 0.106    |
| Thalamus         | 0.251                 | 0.039    | 0.217                 | 0.042    | <b>0.037</b>          | 0.078    | 0.134                 | 0.053    | 0.104                 | 0.057    |

<sup>1</sup>Unadjusted *P* values are shown, with in **bold** those that are significant ( $P < 0.05$ ) at the uncorrected level. Those *p*-values for diagnosis that survived multiple testing correction (FDR < 0.05) are also indicated in *italic*.

**Supplementary Table 7. Sex:diagnosis interaction effects for cortical thickness AIs.** P-values and Cohen's *d* effect sizes for the main effects of diagnosis are shown for the primary and sex:diagnosis interaction models, as well as for the stratification analyses separately in males and females. P-values for the sex:diagnosis interaction effects are also shown. Additionally, for the primary and interaction models the AIC and BIC model fit measures are shown.

| region                            | Primary analysis model         |          |        |        | Sex:diagnosis interaction model |          |                                    |        |        | Males only                     |          | Females only                   |          |
|-----------------------------------|--------------------------------|----------|--------|--------|---------------------------------|----------|------------------------------------|--------|--------|--------------------------------|----------|--------------------------------|----------|
|                                   | P <sub>diag</sub> <sup>1</sup> | <i>d</i> | AIC    | BIC    | P <sub>diag</sub> <sup>1</sup>  | <i>d</i> | P <sub>diag*sex</sub> <sup>1</sup> | AIC    | BIC    | P <sub>diag</sub> <sup>1</sup> | <i>d</i> | P <sub>diag</sub> <sup>1</sup> | <i>d</i> |
| bankssts thickness                | 0.950                          | 0.002    | -12107 | -12070 | 0.672                           | -0.03    | 0.385                              | -12106 | -12063 | 0.650                          | 0.02     | 0.512                          | -0.05    |
| caudalanteriorcingulate thickness | 0.982                          | -0.001   | -10511 | -10474 | 0.859                           | -0.02    | 0.639                              | -10509 | -10466 | 0.970                          | 0.00     | 0.722                          | -0.03    |
| caudalmiddlefrontal thickness     | 0.086                          | -0.06    | -14975 | -14938 | 0.447                           | -0.06    | 0.058                              | -14977 | -14934 | 0.457                          | -0.03    | <b>0.014</b>                   | -0.20    |
| cuneus thickness                  | 0.066                          | -0.06    | -13627 | -13590 | 0.339                           | -0.06    | 0.092                              | -13628 | -13585 | 0.382                          | -0.03    | <b>0.015</b>                   | -0.20    |
| entorhinal thickness              | 0.095                          | 0.06     | -9348  | -9311  | 0.087                           | -0.02    | 0.636                              | -9347  | -9304  | 0.086                          | 0.07     | 0.823                          | 0.02     |
| frontalpole thickness             | 0.765                          | -0.01    | -8929  | -8892  | 0.616                           | 0.02     | 0.586                              | -8927  | -8884  | 0.630                          | -0.02    | 0.499                          | 0.06     |
| fusiform thickness                | <b>0.001</b>                   | 0.11     | -15724 | -15687 | <b>0.002</b>                    | -0.02    | 0.536                              | -15722 | -15679 | 0.003                          | 0.11     | 0.252                          | 0.09     |
| inferiorparietal thickness        | 0.065                          | -0.06    | -16323 | -16286 | 0.271                           | -0.05    | 0.172                              | -16322 | -16279 | 0.289                          | -0.04    | 0.061                          | -0.15    |
| inferiortemporal thickness        | <b>0.003</b>                   | 0.10     | -14532 | -14495 | <b>0.002</b>                    | -0.03    | 0.314                              | -14531 | -14488 | <b>0.002</b>                   | 0.12     | 0.663                          | 0.04     |
| insula thickness                  | 0.252                          | 0.04     | -15213 | -15176 | <b>0.030</b>                    | -0.09    | <b>0.007</b>                       | -15218 | -15175 | 0.037                          | 0.08     | 0.181                          | -0.11    |
| isthmuscingulate thickness        | <b>0.010</b>                   | -0.09    | -12320 | -12283 | <b>0.006</b>                    | 0.03     | 0.330                              | -12319 | -12276 | <b>0.007</b>                   | -0.10    | 0.666                          | -0.04    |
| lateraloccipital thickness        | 0.359                          | 0.03     | -16137 | -16100 | 0.240                           | -0.03    | 0.414                              | -16135 | -16092 | 0.259                          | 0.04     | 0.797                          | -0.02    |
| lateralorbitofrontal thickness    | 0.872                          | 0.01     | -14413 | -14376 | 0.930                           | 0.02     | 0.576                              | -14411 | -14368 | 0.930                          | 0.00     | 0.783                          | 0.02     |
| lingual thickness                 | 0.594                          | 0.02     | -15045 | -15008 | 0.305                           | -0.04    | 0.198                              | -15044 | -15001 | 0.353                          | 0.04     | 0.342                          | -0.08    |
| medialorbitofrontal thickness     | <b>0.001</b>                   | -0.12    | -13057 | -13020 | <b>0.0005</b>                   | 0.03     | 0.420                              | -13055 | -13012 | <b>0.001</b>                   | -0.13    | 0.534                          | -0.05    |
| middletemporal thickness          | 0.726                          | -0.01    | -14979 | -14942 | 0.567                           | 0.02     | 0.546                              | -14978 | -14934 | 0.535                          | -0.02    | 0.564                          | 0.05     |
| paracentral thickness             | 0.231                          | 0.04     | -15060 | -15024 | 0.074                           | -0.06    | 0.095                              | -15061 | -15018 | 0.080                          | 0.07     | 0.171                          | -0.11    |
| parahippocampal thickness         | 0.856                          | -0.01    | -11609 | -11572 | 0.558                           | 0.03     | 0.322                              | -11608 | -11565 | 0.533                          | -0.02    | 0.210                          | 0.10     |
| parsopercularis thickness         | 0.568                          | -0.02    | -14483 | -14446 | 0.888                           | -0.03    | 0.371                              | -14482 | -14439 | 0.901                          | 0.00     | 0.219                          | -0.10    |
| parsorbitalis thickness           | <b>0.024</b>                   | -0.08    | -11735 | -11698 | 0.112                           | -0.04    | 0.278                              | -11734 | -11691 | 0.099                          | -0.06    | 0.100                          | -0.13    |
| parstriangularis thickness        | 0.759                          | -0.01    | -13813 | -13776 | 0.468                           | 0.04     | 0.288                              | -13812 | -13769 | 0.426                          | -0.03    | 0.317                          | 0.08     |
| pericalcarine thickness           | 0.536                          | -0.02    | -12416 | -12379 | 0.807                           | -0.03    | 0.451                              | -12414 | -12371 | 0.822                          | -0.01    | 0.287                          | -0.09    |
| postcentral thickness             | 0.211                          | -0.04    | -15802 | -15765 | 0.462                           | -0.03    | 0.347                              | -15801 | -15758 | 0.516                          | -0.02    | 0.194                          | -0.11    |
| posteriorcingulate thickness      | <b>0.034</b>                   | -0.07    | -13588 | -13551 | <b>0.019</b>                    | 0.03     | 0.326                              | -13587 | -13543 | 0.023                          | -0.09    | 0.813                          | -0.02    |
| precentral thickness              | 0.547                          | -0.02    | -16743 | -16706 | 0.779                           | -0.02    | 0.528                              | -16742 | -16699 | 0.770                          | -0.01    | 0.655                          | -0.04    |

|                                    |                            |       |        |        |                            |       |              |        |        |                            |       |              |       |
|------------------------------------|----------------------------|-------|--------|--------|----------------------------|-------|--------------|--------|--------|----------------------------|-------|--------------|-------|
| precuneus thickness                | 0.710                      | -0.01 | -16940 | -16903 | 0.599                      | -0.07 | 0.040        | -16942 | -16899 | 0.669                      | 0.02  | 0.033        | -0.17 |
| rostralanteriorcingulate thickness | <b>0.001</b>               | -0.12 | -11088 | -11051 | <b>9.8·10<sup>-6</sup></b> | 0.11  | <b>0.001</b> | -11097 | -11054 | <b>1.4·10<sup>-5</sup></b> | -0.17 | 0.165        | 0.11  |
| rostralmiddlefrontal thickness     | <b>0.003</b>               | -0.10 | -15671 | -15634 | <b>0.003</b>               | 0.02  | 0.512        | -15669 | -15626 | <b>0.003</b>               | -0.11 | 0.382        | -0.07 |
| superiorfrontal thickness          | <b>8.9·10<sup>-5</sup></b> | -0.13 | -17795 | -17758 | <b>2.9·10<sup>-5</sup></b> | 0.05  | 0.135        | -17795 | -17752 | <b>1.5·10<sup>-5</sup></b> | -0.17 | 0.726        | -0.03 |
| superiorparietal thickness         | 0.725                      | 0.01  | -17583 | -17546 | 0.197                      | -0.08 | <b>0.021</b> | -17586 | -17543 | 0.236                      | 0.05  | <b>0.045</b> | -0.16 |
| superiortemporal thickness         | <b>0.049</b>               | -0.07 | -15790 | -15753 | 0.295                      | -0.06 | 0.079        | -15791 | -15748 | 0.292                      | -0.04 | <b>0.017</b> | -0.20 |
| supramarginal thickness            | 0.980                      | 0.00  | -15627 | -15590 | 0.587                      | -0.04 | 0.217        | -15627 | -15583 | 0.516                      | 0.02  | 0.245        | -0.10 |
| temporalpole thickness             | 0.136                      | 0.05  | -9867  | -9830  | 0.116                      | -0.02 | 0.602        | -9865  | -9822  | 0.155                      | 0.05  | 0.708        | 0.03  |
| transversetemporal thickness       | 0.364                      | 0.03  | -11161 | -11124 | 0.275                      | -0.02 | 0.526        | -11159 | -11116 | 0.336                      | 0.04  | 0.973        | 0.003 |
| Total average thickness            | 0.050                      | -0.07 | -22896 | -22859 | 0.249                      | -0.05 | 0.138        | -22896 | -22853 | 0.235                      | -0.05 | <b>0.034</b> | -0.17 |

<sup>1</sup>Unadjusted *P* values are shown, with in **bold** those that are significant ( $P < 0.05$ ) at the uncorrected level. Those that survived multiple testing correction (FDR < 0.05) are also indicated in *italic*.

**Supplementary Table 8. Sex:diagnosis interaction effects for cortical surface area AIs.** P-values and Cohen's *d* effect sizes for the main effects of diagnosis are shown for the primary and sex:diagnosis interaction models, as well as for the stratification analyses separately in males and females. P-values for the sex:diagnosis interaction effects are also shown. Additionally, for the primary and interaction models the AIC and BIC model fit measures are shown. .

| region                               | Primary analysis model         |          |        |        | Sex:diagnosis interaction model |          |                                    |        |        | Males only                     |          | Females only                   |          |
|--------------------------------------|--------------------------------|----------|--------|--------|---------------------------------|----------|------------------------------------|--------|--------|--------------------------------|----------|--------------------------------|----------|
|                                      | P <sub>diag</sub> <sup>1</sup> | <i>d</i> | AIC    | BIC    | P <sub>diag</sub> <sup>1</sup>  | <i>d</i> | P <sub>diag*sex</sub> <sup>1</sup> | AIC    | BIC    | P <sub>diag</sub> <sup>1</sup> | <i>d</i> | P <sub>diag</sub> <sup>1</sup> | <i>d</i> |
| bankssts surface area                | 0.332                          | 0.03     | -6952  | -6915  | 0.565                           | 0.02     | 0.488                              | -6951  | -6908  | 0.586                          | 0.02     | 0.331                          | 0.08     |
| caudalanteriorcingulate surface area | 0.662                          | -0.02    | -5027  | -4990  | 0.858                           | -0.02    | 0.610                              | -5025  | -4982  | 0.891                          | -0.01    | 0.480                          | -0.06    |
| caudalmiddlefrontal surface area     | 0.483                          | -0.02    | -7903  | -7866  | 0.365                           | 0.02     | 0.524                              | -7901  | -7858  | 0.383                          | -0.03    | 0.818                          | 0.02     |
| cuneus surface area                  | 0.215                          | -0.04    | -8508  | -8471  | 0.680                           | -0.06    | 0.087                              | -8509  | -8466  | 0.721                          | -0.01    | <b>0.019</b>                   | -0.20    |
| entorhinal surface area              | 0.108                          | -0.06    | -4612  | -4576  | 0.180                           | -0.01    | 0.786                              | -4610  | -4567  | 0.177                          | -0.05    | 0.242                          | -0.10    |
| frontalpole surface area             | 0.388                          | 0.03     | -6670  | -6633  | 0.412                           | -0.003   | 0.932                              | -6668  | -6625  | 0.388                          | 0.03     | 0.827                          | 0.02     |
| fusiform surface area                | <b>0.010</b>                   | -0.09    | -10454 | -10417 | <b>0.009</b>                    | 0.02     | 0.534                              | -10452 | -10409 | <b>0.008</b>                   | -0.10    | 0.611                          | -0.04    |
| inferiorparietal surface area        | 0.857                          | 0.01     | -10288 | -10251 | 0.982                           | 0.02     | 0.660                              | -10286 | -10243 | 0.979                          | -0.001   | 0.527                          | 0.05     |
| inferiortemporal surface area        | 0.585                          | -0.02    | -9610  | -9573  | 0.947                           | -0.04    | 0.307                              | -9609  | -9566  | 0.913                          | -0.004   | 0.214                          | -0.10    |
| insula surface area                  | 0.701                          | 0.01     | -11222 | -11185 | 0.930                           | 0.02     | 0.532                              | -11220 | -11177 | 0.997                          | -0.0001  | 0.561                          | 0.05     |
| isthmuscingulate surface area        | 0.611                          | 0.02     | -7974  | -7937  | 0.839                           | 0.02     | 0.540                              | -7973  | -7930  | 0.796                          | 0.01     | 0.405                          | 0.07     |
| lateraloccipital surface area        | 0.654                          | -0.02    | -10709 | -10672 | 0.492                           | 0.02     | 0.504                              | -10707 | -10664 | 0.422                          | -0.03    | 0.729                          | 0.03     |
| lateralorbitofrontal surface area    | <b>0.001</b>                   | -0.11    | -11771 | -11734 | <b>0.001</b>                    | 0.02     | 0.567                              | -11769 | -11726 | <b>0.003</b>                   | -0.12    | 0.166                          | -0.11    |
| lingual surface area                 | 0.820                          | 0.01     | -9826  | -9789  | 0.949                           | 0.02     | 0.517                              | -9825  | -9782  | 0.904                          | -0.005   | 0.594                          | 0.04     |
| medialorbitofrontal surface area     | <b>0.002</b>                   | 0.11     | -9475  | -9438  | <b>0.009</b>                    | 0.02     | 0.526                              | -9474  | -9431  | <b>0.011</b>                   | 0.10     | <b>0.020</b>                   | 0.19     |
| middletemporal surface area          | 0.661                          | -0.02    | -11137 | -11100 | 0.891                           | -0.02    | 0.537                              | -11135 | -11092 | 0.835                          | -0.01    | 0.559                          | -0.05    |
| paracentral surface area             | 0.071                          | 0.06     | -9051  | -9014  | 0.232                           | 0.04     | 0.298                              | -9050  | -9007  | 0.187                          | 0.05     | 0.075                          | 0.15     |
| parahippocampal surface area         | 0.853                          | -0.01    | -7631  | -7594  | 0.990                           | -0.01    | 0.668                              | -7629  | -7586  | 0.934                          | 0.003    | 0.628                          | -0.04    |
| parsopercularis surface area         | 0.880                          | 0.01     | -7494  | -7457  | 0.912                           | 0.02     | 0.564                              | -7492  | -7449  | 0.982                          | 0.001    | 0.628                          | 0.04     |
| parsorbitalis surface area           | 0.133                          | 0.05     | -9436  | -9399  | 0.233                           | 0.01     | 0.688                              | -9434  | -9391  | 0.202                          | 0.05     | 0.363                          | 0.08     |
| parstriangularis surface area        | 0.929                          | 0.00     | -7851  | -7814  | 0.608                           | 0.05     | 0.159                              | -7851  | -7808  | 0.581                          | -0.02    | 0.182                          | 0.11     |
| pericalcarine surface area           | 0.561                          | -0.02    | -8905  | -8868  | 0.933                           | -0.05    | 0.143                              | -8905  | -8862  | 0.940                          | 0.00     | 0.070                          | -0.15    |
| postcentral surface area             | 0.430                          | 0.03     | -10895 | -10858 | 0.706                           | 0.03     | 0.436                              | -10893 | -10850 | 0.681                          | 0.02     | 0.305                          | 0.08     |
| posteriorcingulate surface area      | 0.475                          | -0.02    | -7924  | -7887  | 0.252                           | 0.04     | 0.241                              | -7923  | -7880  | 0.265                          | -0.04    | 0.425                          | 0.07     |
| precentral surface area              | 0.154                          | -0.05    | -12203 | -12166 | 0.188                           | 0.00     | 0.952                              | -12201 | -12158 | 0.279                          | -0.04    | 0.622                          | -0.04    |

|                                       |       |        |        |        |       |       |       |        |        |       |       |       |       |
|---------------------------------------|-------|--------|--------|--------|-------|-------|-------|--------|--------|-------|-------|-------|-------|
| precuneus surface area                | 0.915 | -0.004 | -11488 | -11451 | 0.760 | 0.02  | 0.626 | -11486 | -11443 | 0.708 | -0.01 | 0.723 | 0.03  |
| rostralanteriorcingulate surface area | 0.317 | -0.03  | -6163  | -6126  | 0.191 | 0.03  | 0.342 | -6162  | -6119  | 0.220 | -0.05 | 0.633 | 0.04  |
| rostralmiddlefrontal surface area     | 0.694 | 0.01   | -11642 | -11605 | 0.859 | 0.04  | 0.204 | -11642 | -11599 | 0.753 | -0.01 | 0.187 | 0.11  |
| superiorfrontal surface area          | 0.569 | 0.02   | -13194 | -13157 | 0.521 | -0.01 | 0.766 | -13192 | -13149 | 0.508 | 0.03  | 0.951 | 0.01  |
| superiorparietal surface area         | 0.688 | -0.01  | -11377 | -11340 | 0.699 | 0.00  | 0.955 | -11375 | -11332 | 0.736 | -0.01 | 0.901 | -0.01 |
| superiortemporal surface area         | 0.339 | -0.03  | -11787 | -11750 | 0.244 | 0.02  | 0.478 | -11786 | -11743 | 0.259 | -0.04 | 0.847 | 0.02  |
| supramarginal surface area            | 0.954 | 0.002  | -9191  | -9154  | 0.806 | 0.02  | 0.478 | -9190  | -9147  | 0.838 | -0.01 | 0.498 | 0.06  |
| temporalpole surface area             | 0.517 | 0.02   | -7204  | -7168  | 0.350 | -0.03 | 0.409 | -7203  | -7160  | 0.400 | 0.03  | 0.495 | -0.06 |
| transversetemporal surface area       | 0.870 | 0.01   | -7600  | -7563  | 0.908 | 0.003 | 0.939 | -7598  | -7555  | 0.958 | 0.00  | 0.937 | 0.01  |
| <b>totalsurf</b>                      | 0.344 | -0.03  | -21189 | -21152 | 0.116 | 0.06  | 0.088 | -21190 | -21147 | 0.127 | -0.06 | 0.269 | 0.09  |

<sup>†</sup>Unadjusted *P* values are shown, with in **bold** those that are significant ( $P < 0.05$ ) at the uncorrected level. Those that survived multiple testing correction (FDR < 0.05) are also indicated in *italic*.

**Supplementary Table 9. Sex:diagnosis interaction effects for subcortical volume AIs.** P-values and Cohen's d effect sizes for the main effects of diagnosis are shown for the primary and sex:diagnosis interaction models, as well as for the stratification analyses separately in males and females. P-values for the sex:diagnosis interaction effects are also shown. Additionally, for the primary and interaction models the AIC and BIC model fit measures are shown.

| region           | Primary analysis model         |       |        |        | Sex:diagnosis interaction model |       |                                    |        |        | Males only                     |       | Females only                   |        |
|------------------|--------------------------------|-------|--------|--------|---------------------------------|-------|------------------------------------|--------|--------|--------------------------------|-------|--------------------------------|--------|
|                  | P <sub>diag</sub> <sup>1</sup> | d     | AIC    | BIC    | P <sub>diag</sub> <sup>1</sup>  | d     | P <sub>diag*sex</sub> <sup>1</sup> | AIC    | BIC    | P <sub>diag</sub> <sup>1</sup> | d     | P <sub>diag</sub> <sup>1</sup> | d      |
| Accumbens        | 0.425                          | -0.03 | -7684  | -7647  | 0.231                           | 0.04  | 0.26                               | -7683  | -7640  | 0.234                          | -0.05 | 0.469                          | 0.06   |
| Amygdala         | 0.934                          | 0.003 | -9229  | -9192  | 0.547                           | -0.04 | 0.21                               | -9229  | -9186  | 0.561                          | 0.02  | 0.167                          | -0.11  |
| CaudateNucleus   | <b>0.025</b>                   | 0.08  | -12825 | -12788 | <b>0.010</b>                    | -0.04 | 0.19                               | -12825 | -12782 | <b>0.011</b>                   | 0.10  | 0.959                          | -0.004 |
| GlobusPallidus   | 0.593                          | 0.02  | -9466  | -9429  | 0.201                           | -0.06 | 0.06                               | -9467  | -9424  | 0.204                          | 0.05  | 0.209                          | -0.10  |
| Hippocampus      | 0.485                          | -0.02 | -11814 | -11777 | 0.600                           | -0.01 | 0.79                               | -11812 | -11769 | 0.579                          | -0.02 | 0.412                          | -0.07  |
| LateralVentricle | 0.741                          | -0.01 | -3330  | -3293  | 0.882                           | -0.04 | 0.30                               | -3329  | -3286  | 0.879                          | 0.01  | 0.264                          | -0.09  |
| Putamen          | <b>0.001</b>                   | 0.12  | -13668 | -13632 | <b>0.001</b>                    | -0.01 | 0.70                               | -13667 | -13624 | <b>0.001</b>                   | 0.13  | 0.312                          | 0.08   |
| Thalamus         | 0.252                          | 0.04  | -13885 | -13848 | 0.486                           | 0.03  | 0.41                               | -13884 | -13841 | 0.638                          | 0.02  | 0.060                          | 0.15   |

<sup>1</sup>Unadjusted P values are shown, with in **bold** those that are significant ( $P < 0.05$ ) at the uncorrected level. Those that survived multiple testing correction (FDR < 0.05) are also indicated in *italic*

**Supplementary Table 10. Age:diagnosis interaction effects for cortical thickness AIs.** P-values and Cohen's *d* effect sizes for the main effects of diagnosis are shown for the primary and age:diagnosis interaction models, as well as for the stratification analyses separately in children and adults. P-values for the age:diagnosis interaction effects are also shown. Additionally, for both primary and interaction models the AIC and BIC model fit measures are shown.

| region                            | Primary analysis model         |          |        |        | Age:diagnosis interaction model |          |                                    |        |        | Children only                  |          | Adults only                    |          |
|-----------------------------------|--------------------------------|----------|--------|--------|---------------------------------|----------|------------------------------------|--------|--------|--------------------------------|----------|--------------------------------|----------|
|                                   | P <sub>diag</sub> <sup>1</sup> | <i>d</i> | AIC    | BIC    | P <sub>diag</sub> <sup>1</sup>  | <i>d</i> | P <sub>diag*age</sub> <sup>1</sup> | AIC    | BIC    | P <sub>diag</sub> <sup>1</sup> | <i>d</i> | P <sub>diag</sub> <sup>1</sup> | <i>d</i> |
| bankssts thickness                | 0.950                          | 0.002    | -12107 | -12070 | 0.819                           | 0.01     | 0.767                              | -12105 | -12062 | 0.542                          | -0.025   | 0.306                          | 0.06     |
| caudalanteriorcingulate thickness | 0.982                          | -0.001   | -10511 | -10474 | 0.291                           | 0.04     | 0.232                              | -10510 | -10467 | 0.610                          | -0.021   | 0.402                          | 0.05     |
| caudalmiddlefrontal thickness     | 0.086                          | -0.06    | -14975 | -14938 | 0.840                           | -0.02    | 0.468                              | -14974 | -14931 | 0.368                          | -0.037   | 0.078                          | -0.11    |
| cuneus thickness                  | 0.066                          | -0.06    | -13627 | -13590 | 0.179                           | 0.02     | 0.607                              | -13625 | -13582 | 0.087                          | -0.071   | 0.337                          | -0.06    |
| entorhinal thickness              | 0.095                          | 0.06     | -9348  | -9311  | 0.102                           | -0.03    | 0.348                              | -9347  | -9304  | 0.288                          | 0.044    | 0.131                          | 0.10     |
| frontalpole thickness             | 0.765                          | -0.01    | -8929  | -8892  | 0.864                           | -0.01    | 0.716                              | -8927  | -8884  | 0.665                          | 0.018    | 0.235                          | -0.07    |
| fusiform thickness                | <b>0.001</b>                   | 0.11     | -15724 | -15687 | <b>0.006</b>                    | -0.05    | 0.180                              | -15724 | -15681 | <b>0.001</b>                   | 0.135    | 0.279                          | 0.07     |
| inferiorparietal thickness        | 0.065                          | -0.06    | -16323 | -16286 | 0.171                           | 0.02     | 0.589                              | -16321 | -16278 | 0.140                          | -0.061   | 0.313                          | -0.06    |
| inferiortemporal thickness        | <b>0.003</b>                   | 0.10     | -14532 | -14495 | <b>0.031</b>                    | -0.03    | 0.412                              | -14530 | -14487 | 0.017                          | 0.098    | 0.067                          | 0.12     |
| insula thickness                  | 0.252                          | 0.04     | -15213 | -15176 | 0.206                           | -0.03    | 0.418                              | -15211 | -15168 | 0.212                          | 0.051    | 0.833                          | 0.01     |
| isthmuscingulate thickness        | <b>0.010</b>                   | -0.09    | -12320 | -12283 | 0.072                           | 0.02     | 0.535                              | -12318 | -12275 | <b>0.011</b>                   | -0.104   | 0.342                          | -0.06    |
| lateraloccipital thickness        | 0.359                          | 0.03     | -16137 | -16100 | 0.650                           | -0.0003  | 0.992                              | -16135 | -16092 | 0.319                          | 0.041    | 0.832                          | 0.01     |
| lateralorbitofrontal thickness    | 0.872                          | 0.01     | -14413 | -14376 | 0.558                           | 0.03     | 0.447                              | -14411 | -14368 | 0.998                          | 0.000    | 0.808                          | 0.02     |
| lingual thickness                 | 0.594                          | 0.02     | -15045 | -15008 | 0.294                           | -0.03    | 0.366                              | -15044 | -15000 | 0.351                          | 0.038    | 0.804                          | -0.02    |
| medialorbitofrontal thickness     | <b>0.001</b>                   | -0.12    | -13057 | -13020 | <b>0.023</b>                    | 0.02     | 0.499                              | -13055 | -13012 | <b>0.001</b>                   | -0.143   | 0.241                          | -0.07    |
| middletemporal thickness          | 0.726                          | -0.01    | -14979 | -14942 | 0.219                           | -0.05    | 0.109                              | -14980 | -14937 | 0.576                          | 0.023    | 0.112                          | -0.10    |
| paracentral thickness             | 0.231                          | 0.04     | -15060 | -15024 | 0.629                           | 0.004    | 0.909                              | -15058 | -15015 | 0.124                          | 0.063    | 0.935                          | 0.01     |
| parahippocampal thickness         | 0.856                          | -0.01    | -11609 | -11572 | 0.258                           | -0.05    | 0.162                              | -11609 | -11566 | 0.221                          | 0.050    | 0.065                          | -0.12    |
| parsopercularis thickness         | 0.568                          | -0.02    | -14483 | -14446 | 0.989                           | -0.01    | 0.739                              | -14482 | -14438 | 0.653                          | -0.019   | 0.748                          | -0.02    |
| parsorbitalis thickness           | <b>0.024</b>                   | -0.08    | -11735 | -11698 | 0.372                           | -0.01    | 0.814                              | -11733 | -11690 | <b>0.035</b>                   | -0.087   | 0.449                          | -0.05    |
| parstriangularis thickness        | 0.759                          | -0.01    | -13813 | -13776 | 0.817                           | -0.01    | 0.663                              | -13811 | -13768 | 0.989                          | 0.001    | 0.673                          | -0.03    |
| pericalcarine thickness           | 0.536                          | -0.02    | -12416 | -12379 | <b>0.008</b>                    | 0.09     | <b>0.008</b>                       | -12421 | -12378 | 0.081                          | -0.072   | 0.116                          | 0.10     |
| postcentral thickness             | 0.211                          | -0.04    | -15802 | -15765 | 0.306                           | -0.06    | 0.061                              | -15804 | -15761 | 0.669                          | 0.018    | <b>0.003</b>                   | -0.19    |
| posteriorcingulate thickness      | <b>0.034</b>                   | -0.07    | -13588 | -13551 | 0.733                           | -0.03    | 0.427                              | -13586 | -13543 | 0.232                          | -0.049   | 0.104                          | -0.10    |
| precentral thickness              | 0.547                          | -0.02    | -16743 | -16706 | 0.179                           | -0.06    | 0.061                              | -16745 | -16702 | 0.533                          | 0.026    | 0.043                          | -0.13    |
| precuneus thickness               | 0.710                          | -0.01    | -16940 | -16903 | 0.223                           | 0.04     | 0.235                              | -16939 | -16896 | 0.242                          | -0.048   | 0.275                          | 0.07     |



|                                    |                              |       |        |        |              |        |       |        |        |              |        |              |       |
|------------------------------------|------------------------------|-------|--------|--------|--------------|--------|-------|--------|--------|--------------|--------|--------------|-------|
| rostralanteriorcingulate thickness | <b>0.001</b>                 | -0.12 | -11088 | -11051 | <b>0.015</b> | 0.03   | 0.370 | -11087 | -11044 | <b>0.007</b> | -0.111 | 0.058        | -0.12 |
| rostralmiddlefrontal thickness     | <b>0.003</b>                 | -0.10 | -15671 | -15634 | 0.579        | -0.03  | 0.315 | -15670 | -15627 | <b>0.019</b> | -0.097 | 0.131        | -0.09 |
| superiorfrontal thickness          | <b>8.9 · 10<sup>-5</sup></b> | -0.13 | -17795 | -17758 | 0.056        | 0.0002 | 0.995 | -17793 | -17750 | <b>0.009</b> | -0.107 | <b>0.004</b> | -0.18 |
| superiorparietal thickness         | 0.725                        | 0.01  | -17583 | -17546 | 0.255        | -0.04  | 0.268 | -17582 | -17539 | 0.473        | 0.030  | 0.519        | -0.04 |
| superiortemporal thickness         | <b>0.049</b>                 | -0.07 | -15790 | -15753 | 0.439        | -0.01  | 0.832 | -15788 | -15745 | <b>0.040</b> | -0.085 | 0.474        | -0.05 |
| supramarginal thickness            | 0.980                        | 0.00  | -15627 | -15590 | 0.578        | -0.02  | 0.533 | -15625 | -15582 | 0.490        | 0.028  | 0.374        | -0.06 |
| temporalpole thickness             | 0.136                        | 0.05  | -9867  | -9830  | 0.238        | -0.02  | 0.604 | -9865  | -9822  | 0.119        | 0.064  | 0.614        | 0.03  |
| transversetemporal thickness       | 0.364                        | 0.03  | -11161 | -11124 | 0.812        | 0.01   | 0.815 | -11159 | -11116 | 0.922        | 0.004  | 0.169        | 0.09  |
| Total average thickness            | 0.050                        | -0.07 | -22896 | -22859 | 0.835        | -0.05  | 0.183 | -22895 | -22852 | 0.358        | -0.038 | <b>0.043</b> | -0.13 |

<sup>1</sup>Unadjusted *P* values are shown, with in **bold** those that are significant (*P* < 0.05) at the uncorrected level. Those that survived multiple testing correction (FDR < 0.05) are also indicated in *italic*

**Supplementary Table 11. Age:diagnosis interaction effects for cortical surface area AIs.** P-values and Cohen's *d* effect sizes for the main effects of diagnosis are shown for the primary and age:diagnosis interaction models, as well as for the stratification analyses separately in children and adults. P-values for the age:diagnosis interaction effects are also shown. Additionally, for both primary and interaction models the AIC and BIC model fit measures are shown..

| region                               | Primary analysis model         |          |        |        | Age:diagnosis interaction model |          |                                    |        |        | Children only                  |                      | Adults only                    |          |
|--------------------------------------|--------------------------------|----------|--------|--------|---------------------------------|----------|------------------------------------|--------|--------|--------------------------------|----------------------|--------------------------------|----------|
|                                      | P <sub>diag</sub> <sup>1</sup> | <i>d</i> | AIC    | BIC    | P <sub>diag</sub> <sup>1</sup>  | <i>d</i> | P <sub>diag*age</sub> <sup>1</sup> | AIC    | BIC    | P <sub>diag</sub> <sup>1</sup> | <i>d</i>             | P <sub>diag</sub> <sup>1</sup> | <i>d</i> |
| bankssts surface area                | 0.332                          | 0.03     | -6952  | -6915  | 0.365                           | -0.02    | 0.621                              | -6950  | -6907  | 0.277                          | 0.05                 | 0.779                          | 0.018    |
| caudalanteriorcingulate surface area | 0.662                          | -0.02    | -5027  | -4990  | 0.076                           | 0.06     | 0.074                              | -5028  | -4985  | 0.355                          | -0.04                | 0.542                          | 0.038    |
| caudalmiddlefrontal surface area     | 0.483                          | -0.02    | -7903  | -7866  | 0.571                           | -0.04    | 0.298                              | -7902  | -7859  | 0.848                          | 0.01                 | 0.105                          | -0.102   |
| cuneus surface area                  | 0.215                          | -0.04    | -8508  | -8471  | 0.032                           | 0.06     | 0.079                              | -8509  | -8466  | 0.190                          | -0.05                | 0.609                          | -0.032   |
| entorhinal surface area              | 0.108                          | -0.06    | -4612  | -4576  | 0.954                           | -0.03    | 0.406                              | -4611  | -4568  | 0.230                          | -0.05                | 0.298                          | -0.066   |
| frontalpole surface area             | 0.388                          | 0.03     | -6670  | -6633  | 0.151                           | -0.04    | 0.245                              | -6669  | -6626  | 0.230                          | 0.05                 | 0.917                          | -0.007   |
| fusiform surface area                | <b>0.010</b>                   | -0.09    | -10454 | -10417 | 0.157                           | 0.01     | 0.860                              | -10452 | -10409 | <b>0.017</b>                   | -0.10                | 0.217                          | -0.077   |
| inferiorparietal surface area        | 0.857                          | 0.01     | -10288 | -10251 | 0.361                           | -0.03    | 0.345                              | -10286 | -10243 | 0.687                          | 0.02                 | 0.836                          | -0.013   |
| inferiortemporal surface area        | 0.585                          | -0.02    | -9610  | -9573  | 0.190                           | 0.04     | 0.232                              | -9609  | -9566  | 0.625                          | -0.02                | 0.739                          | -0.021   |
| insula surface area                  | 0.701                          | 0.01     | -11222 | -11185 | 0.229                           | 0.05     | 0.111                              | -11222 | -11179 | 0.652                          | -0.02                | 0.185                          | 0.083    |
| isthmuscingulate surface area        | 0.611                          | 0.02     | -7974  | -7937  | 0.089                           | -0.06    | 0.096                              | -7975  | -7932  | 0.116                          | 0.06                 | 0.285                          | -0.067   |
| lateraloccipital surface area        | 0.654                          | -0.02    | -10709 | -10672 | 0.247                           | 0.04     | 0.282                              | -10708 | -10665 | 0.197                          | -0.05                | 0.272                          | 0.069    |
| lateralorbitofrontal surface area    | <b>0.001</b>                   | -0.11    | -11771 | -11734 | 0.042                           | 0.02     | 0.622                              | -11769 | -11726 | <b>0.001</b>                   | -0.13                | 0.247                          | -0.073   |
| lingual surface area                 | 0.820                          | 0.01     | -9826  | -9789  | 0.609                           | -0.02    | 0.646                              | -9824  | -9781  | 0.597                          | 0.02                 | 0.734                          | -0.021   |
| medialorbitofrontal surface area     | 0.002                          | 0.11     | -9475  | -9438  | <b>0.041</b>                    | -0.02    | 0.568                              | -9474  | -9431  | 0.009                          | 0.11                 | 0.068                          | 0.114    |
| middletemporal surface area          | 0.661                          | -0.02    | -11137 | -11100 | 0.478                           | -0.04    | 0.290                              | -11136 | -11093 | 0.919                          | 0.00                 | 0.385                          | -0.054   |
| paracentral surface area             | 0.071                          | 0.06     | -9051  | -9014  | 0.723                           | 0.05     | 0.156                              | -9051  | -9008  | 0.381                          | 0.04                 | 0.074                          | 0.112    |
| parahippocampal surface area         | 0.853                          | -0.01    | -7631  | -7594  | 0.181                           | 0.05     | 0.154                              | -7631  | -7588  | 0.457                          | -0.03                | 0.405                          | 0.052    |
| parsopercularis surface area         | 0.880                          | 0.01     | -7494  | -7457  | 0.591                           | 0.02     | 0.487                              | -7493  | -7450  | 0.915                          | -0.004               | 0.670                          | 0.027    |
| parsorbitalis surface area           | 0.133                          | 0.05     | -9436  | -9399  | 0.979                           | 0.03     | 0.383                              | -9435  | -9392  | 0.212                          | 0.05                 | 0.617                          | 0.031    |
| parstriangularis surface area        | 0.929                          | 0.00     | -7851  | -7814  | 0.065                           | -0.07    | <b>0.039</b>                       | -7853  | -7810  | 0.516                          | 0.03                 | 0.267                          | -0.070   |
| pericalcarine surface area           | 0.561                          | -0.02    | -8905  | -8868  | 0.790                           | -0.001   | 0.984                              | -8903  | -8860  | 1.000                          | 1.1·10 <sup>-5</sup> | 0.232                          | -0.075   |
| postcentral surface area             | 0.430                          | 0.03     | -10895 | -10858 | 0.463                           | -0.01    | 0.689                              | -10893 | -10850 | 0.212                          | 0.05                 | 0.639                          | -0.029   |
| posteriorcingulate surface area      | 0.475                          | -0.02    | -7924  | -7887  | 0.551                           | 0.01     | 0.777                              | -7922  | -7879  | 0.520                          | -0.03                | 0.698                          | -0.024   |
| precentral surface area              | 0.154                          | -0.05    | -12203 | -12166 | 0.894                           | -0.03    | 0.344                              | -12202 | -12159 | 0.528                          | -0.03                | 0.110                          | -0.100   |

|                                       |       |        |        |        |       |        |              |        |        |       |        |              |        |
|---------------------------------------|-------|--------|--------|--------|-------|--------|--------------|--------|--------|-------|--------|--------------|--------|
| precuneus surface area                | 0.915 | -0.004 | -11488 | -11451 | 0.120 | -0.06  | 0.066        | -11489 | -11446 | 0.474 | 0.03   | 0.215        | -0.078 |
| rostralanteriorcingulate surface area | 0.317 | -0.03  | -6163  | -6126  | 0.709 | -0.005 | 0.895        | -6161  | -6118  | 0.974 | 0.00   | 0.056        | -0.120 |
| rostralmiddlefrontal surface area     | 0.694 | 0.01   | -11642 | -11605 | 0.628 | -0.01  | 0.737        | -11640 | -11597 | 0.977 | 0.00   | 0.426        | 0.050  |
| superiorfrontal surface area          | 0.569 | 0.02   | -13194 | -13157 | 0.090 | -0.06  | 0.106        | -13194 | -13151 | 0.104 | 0.07   | 0.215        | -0.078 |
| superiorparietal surface area         | 0.688 | -0.01  | -11377 | -11340 | 0.353 | 0.03   | 0.400        | -11375 | -11332 | 0.632 | -0.02  | 0.984        | 0.001  |
| superiortemporal surface area         | 0.339 | -0.03  | -11787 | -11750 | 0.028 | -0.11  | <b>0.002</b> | -11795 | -11752 | 0.327 | 0.04   | <b>0.002</b> | -0.194 |
| supramarginal surface area            | 0.954 | 0.002  | -9191  | -9154  | 0.159 | -0.05  | 0.113        | -9192  | -9149  | 0.437 | 0.03   | 0.354        | -0.058 |
| temporalpole surface area             | 0.517 | 0.02   | -7204  | -7168  | 0.430 | 0.04   | 0.205        | -7204  | -7161  | 0.945 | -0.003 | 0.273        | 0.069  |
| transversetemporal surface area       | 0.870 | 0.01   | -7600  | -7563  | 0.407 | -0.03  | 0.391        | -7598  | -7555  | 0.721 | 0.01   | 0.807        | -0.015 |
| <b>totalsurf</b>                      | 0.344 | -0.03  | -21189 | -21152 | 0.592 | -0.04  | 0.253        | -21188 | -21145 | 0.966 | 0.002  | 0.149        | -0.090 |

<sup>†</sup>Unadjusted *P* values are shown, with in **bold** those that are significant ( $P < 0.05$ ) at the uncorrected level. Those that survived multiple testing correction (FDR < 0.05) are also indicated in *italic*

**Supplementary Table 12. Age:diagnosis interaction effects for subcortical volume AIs.** P-values and Cohen's *d* effect sizes for the main effects of diagnosis are shown for the primary and age:diagnosis interaction models, as well as for the stratification analyses separately in children and adults. P-values for the age:diagnosis interaction effects are also shown. Additionally, for both primary and interaction models the AIC and BIC model fit measures are shown..

| region           | Primary analysis model                |          |        |        | Age:diagnosis interaction model       |          |                                           |        |        | Children only                         |          | Adults only                           |          |
|------------------|---------------------------------------|----------|--------|--------|---------------------------------------|----------|-------------------------------------------|--------|--------|---------------------------------------|----------|---------------------------------------|----------|
|                  | <i>P</i> <sub>diag</sub> <sup>1</sup> | <i>d</i> | AIC    | BIC    | <i>P</i> <sub>diag</sub> <sup>1</sup> | <i>d</i> | <i>P</i> <sub>diag*age</sub> <sup>1</sup> | AIC    | BIC    | <i>P</i> <sub>diag</sub> <sup>1</sup> | <i>d</i> | <i>P</i> <sub>diag</sub> <sup>1</sup> | <i>d</i> |
| Accumbens        | 0.425                                 | -0.03    | -7684  | -7647  | 0.417                                 | -0.05    | 0.169                                     | -7684  | -7641  | 0.990                                 | 0.001    | 0.180                                 | -0.084   |
| Amygdala         | 0.934                                 | 0.003    | -9229  | -9192  | 0.149                                 | 0.06     | 0.089                                     | -9230  | -9187  | 0.300                                 | -0.04    | 0.109                                 | 0.101    |
| CaudateNucleus   | 0.025                                 | 0.08     | -12825 | -12788 | 0.986                                 | 0.04     | 0.204                                     | -12824 | -12781 | 0.152                                 | 0.06     | 0.138                                 | 0.093    |
| GlobusPallidus   | 0.593                                 | 0.02     | -9466  | -9429  | 0.056                                 | 0.09     | <b>0.013</b>                              | -9470  | -9427  | 0.818                                 | -0.01    | 0.238                                 | 0.074    |
| Hippocampus      | 0.485                                 | -0.02    | -11814 | -11777 | 0.187                                 | 0.04     | 0.262                                     | -11814 | -11770 | 0.189                                 | -0.05    | 0.572                                 | 0.035    |
| LateralVentricle | 0.741                                 | -0.01    | -3330  | -3293  | 0.696                                 | -0.02    | 0.529                                     | -3329  | -3286  | 0.892                                 | -0.01    | 0.713                                 | -0.024   |
| Putamen          | <b>0.001</b>                          | 0.12     | -13668 | -13632 | 0.331                                 | 0.03     | 0.434                                     | -13667 | -13624 | <b>0.001</b>                          | 0.13     | 0.255                                 | 0.071    |
| Thalamus         | 0.252                                 | 0.04     | -13885 | -13848 | 0.240                                 | -0.02    | 0.480                                     | -13884 | -13840 | 0.400                                 | 0.03     | 0.609                                 | 0.032    |

<sup>1</sup>Unadjusted *P* values are shown, with in **bold** those that are significant ( $P < 0.05$ ) at the uncorrected level. Those that survived multiple testing correction (FDR < 0.05) are also indicated in *italic*

**Supplementary Table 13. Association of IQ with asymmetry within cases (top) and within controls (bottom), for the AIs that showed significant effects of diagnosis in the primary analysis.**

| AI region                          | N total | $\beta$ -value |          |          | Standard Error |         |         | t-value |       |       | P-value <sup>1</sup> |              |               |
|------------------------------------|---------|----------------|----------|----------|----------------|---------|---------|---------|-------|-------|----------------------|--------------|---------------|
|                                    |         | IQ             | sex      | age      | IQ             | sex     | age     | IQ      | sex   | age   | IQ                   | sex          | age           |
| <b>within cases:</b>               |         |                |          |          |                |         |         |         |       |       |                      |              |               |
| fusiform thickness                 | 1360    | -0.00007       | 0.00054  | -0.00001 | 0.00004        | 0.00198 | 0.00011 | -1.75   | 0.27  | -0.13 | 0.081                | 0.784        | 0.897         |
| inferiortemporal thickness         | 1361    | -0.00008       | -0.00124 | 0.00004  | 0.00005        | 0.00230 | 0.00012 | -1.72   | -0.54 | 0.36  | 0.085                | 0.591        | 0.718         |
| isthmuscingulate thickness         | 1358    | -0.00007       | 0.00557  | 0.00038  | 0.00006        | 0.00304 | 0.00013 | -1.25   | 1.83  | 2.88  | 0.212                | 0.067        | <b>0.004</b>  |
| medialorbitofrontal thickness      | 1360    | -0.00004       | 0.00073  | 0.00046  | 0.00005        | 0.00272 | 0.00014 | -0.68   | 0.27  | 3.21  | 0.498                | 0.789        | <b>0.001</b>  |
| rostralanteriorcingulate thickness | 1357    | 0.00019        | 0.00950  | 0.00004  | 0.00008        | 0.00376 | 0.00020 | 2.49    | 2.53  | 0.20  | <b>0.013</b>         | <b>0.012</b> | 0.844         |
| rostralmiddlefrontal thickness     | 1362    | -0.00003       | 0.00245  | -0.00031 | 0.00004        | 0.00187 | 0.00011 | -0.75   | 1.31  | -2.89 | 0.456                | 0.190        | <b>0.004</b>  |
| superiorfrontal thickness          | 1362    | -0.00003       | -0.00001 | 0.00005  | 0.00003        | 0.00144 | 0.00008 | -0.91   | -0.01 | 0.56  | 0.365                | 0.996        | 0.577         |
| lateralorbitofrontal surface area  | 1351    | -0.00001       | 0.00286  | 0.00003  | 0.00007        | 0.00343 | 0.00018 | -0.21   | 0.83  | 0.19  | 0.833                | 0.404        | 0.847         |
| medialorbitofrontal surface area   | 1352    | -0.00006       | 0.00055  | 0.00009  | 0.00010        | 0.00478 | 0.00024 | -0.66   | 0.11  | 0.38  | 0.509                | 0.909        | 0.702         |
| Putamen                            | 1372    | 0.00003        | 0.00424  | 0.00052  | 0.00006        | 0.00278 | 0.00014 | 0.58    | 1.52  | 3.68  | 0.563                | 0.128        | <b>0.0002</b> |
| <b>within controls:</b>            |         |                |          |          |                |         |         |         |       |       |                      |              |               |
| fusiform thickness                 | 1432    | -0.00002       | 0.00313  | 0.00009  | 0.00005        | 0.00162 | 0.00011 | -0.42   | 1.94  | 0.84  | 0.677                | 0.053        | 0.404         |
| inferiortemporal thickness         | 1431    | -0.00010       | 0.00262  | 0.00008  | 0.00006        | 0.00187 | 0.00013 | -1.82   | 1.40  | 0.66  | 0.069                | 0.161        | 0.511         |
| isthmuscingulate thickness         | 1431    | 0.00001        | 0.00241  | 0.00026  | 0.00008        | 0.00261 | 0.00015 | 0.13    | 0.92  | 1.74  | 0.896                | 0.358        | 0.082         |
| medialorbitofrontal thickness      | 1431    | 0.00003        | -0.00183 | 0.00036  | 0.00007        | 0.00247 | 0.00017 | 0.39    | -0.74 | 2.12  | 0.695                | 0.458        | <b>0.034</b>  |
| rostralanteriorcingulate thickness | 1428    | 0.00009        | -0.00262 | -0.00020 | 0.00010        | 0.00321 | 0.00022 | 0.91    | -0.82 | -0.93 | 0.361                | 0.415        | 0.353         |
| rostralmiddlefrontal thickness     | 1431    | -0.00008       | 0.00133  | -0.00013 | 0.00005        | 0.00170 | 0.00013 | -1.60   | 0.78  | -1.04 | 0.111                | 0.434        | 0.299         |
| superiorfrontal thickness          | 1432    | -0.00012       | -0.00140 | -0.00002 | 0.00004        | 0.00118 | 0.00009 | -3.41   | -1.18 | -0.20 | <b>0.001</b>         | 0.236        | 0.839         |
| lateralorbitofrontal surface area  | 1426    | -0.00008       | -0.00191 | -0.00026 | 0.00008        | 0.00282 | 0.00018 | -0.96   | -0.68 | -1.45 | 0.335                | 0.498        | 0.147         |
| medialorbitofrontal surface area   | 1426    | -0.00018       | -0.00285 | 0.00029  | 0.00012        | 0.00406 | 0.00026 | -1.51   | -0.70 | 1.09  | 0.132                | 0.482        | 0.276         |
| Putamen                            | 1426    | 0.00005        | 0.00145  | 0.00024  | 0.00006        | 0.00206 | 0.00015 | 0.82    | 0.71  | 1.67  | 0.414                | 0.480        | 0.094         |

<sup>1</sup>Unadjusted *P* values are shown, with in **bold** those that are significant ( $P < 0.05$ ) at the uncorrected level.

**Supplementary Table 14. Association of log<sub>10</sub>-normalized ADOS severity scores with brain asymmetry within cases, for the AIs that showed significant effects of diagnosis in the primary analysis.**

| AI region                          | N cases | β-value |         |                        | Standard Error |        |        | t-value |       |       | P-value <sup>1</sup> |       |                            |
|------------------------------------|---------|---------|---------|------------------------|----------------|--------|--------|---------|-------|-------|----------------------|-------|----------------------------|
|                                    |         | ADOS    | sex     | age                    | ADOS           | sex    | age    | ADOS    | sex   | age   | ADOS                 | sex   | age                        |
| fusiform thickness                 | 855     | 0.0059  | 0.0036  | -0.0001                | 0.0060         | 0.0031 | 0.0001 | 0.98    | 1.17  | -0.82 | 0.325                | 0.242 | 0.415                      |
| inferiortemporal thickness         | 857     | -0.0016 | 0.0007  | 3.37·10 <sup>-5</sup>  | 0.0067         | 0.0034 | 0.0001 | -0.24   | 0.20  | 0.25  | 0.807                | 0.841 | 0.805                      |
| isthmuscingulate thickness         | 853     | 0.0192  | 0.0040  | 0.0006                 | 0.0069         | 0.0046 | 0.0001 | 2.76    | 0.87  | 3.97  | <b>0.006</b>         | 0.382 | <b>7.8·10<sup>-5</sup></b> |
| medialorbitofrontal thickness      | 856     | 0.0047  | 0.0002  | 0.0003                 | 0.0078         | 0.0042 | 0.0002 | 0.61    | 0.04  | 2.22  | 0.543                | 0.970 | <b>0.027</b>               |
| rostralanteriorcingulate thickness | 854     | -0.0072 | 0.0065  | 1.93·10 <sup>-5</sup>  | 0.0117         | 0.0060 | 0.0002 | -0.61   | 1.07  | 0.08  | 0.539                | 0.284 | 0.936                      |
| rostralmiddlefrontal thickness     | 858     | 0.0015  | 0.0024  | -0.0004                | 0.0059         | 0.0029 | 0.0001 | 0.26    | 0.84  | -2.86 | 0.796                | 0.401 | <b>0.004</b>               |
| superiorfrontal thickness          | 858     | -0.0009 | -0.0001 | -5.32·10 <sup>-6</sup> | 0.0043         | 0.0021 | 0.0001 | -0.20   | -0.07 | -0.06 | 0.842                | 0.948 | 0.953                      |
| lateralorbitofrontal surface area  | 852     | 0.0039  | 0.0061  | 0.0001                 | 0.0099         | 0.0050 | 0.0002 | 0.39    | 1.22  | 0.67  | 0.696                | 0.223 | 0.503                      |
| medialorbitofrontal surface area   | 854     | -0.0032 | 0.0009  | 0.0002                 | 0.0124         | 0.0066 | 0.0002 | -0.26   | 0.13  | 0.84  | 0.797                | 0.894 | 0.401                      |
| Putamen                            | 866     | 0.0077  | 0.0036  | 0.0004                 | 0.0067         | 0.0035 | 0.0001 | 1.15    | 1.03  | 3.21  | 0.252                | 0.303 | <b>0.001</b>               |

<sup>1</sup>Unadjusted *P* values are shown, with in **bold** those that are significant (*P* < 0.05) at the uncorrected level.

**Supplementary Table 15 Association of medication use with brain asymmetry within cases**, for the AIs that showed significant effects of diagnosis in the primary analysis.

| AI region                            | N<br>cases | β-value |         |                      | Standard Error |        |        | t-value |       |       | P-value <sup>1</sup> |       |                            |
|--------------------------------------|------------|---------|---------|----------------------|----------------|--------|--------|---------|-------|-------|----------------------|-------|----------------------------|
|                                      |            | med     | sex     | age                  | med            | sex    | age    | med     | sex   | age   | med                  | sex   | age                        |
| fusiform thickness                   | 804        | -0.0023 | 0.0046  | 0.0001               | 0.0023         | 0.0029 | 0.0002 | -1.00   | 1.60  | 0.77  | 0.316                | 0.110 | 0.444                      |
| inferiortemporal thickness           | 804        | -0.0028 | 0.0022  | 0.0002               | 0.0026         | 0.0032 | 0.0002 | -1.08   | 0.69  | 0.94  | 0.280                | 0.493 | 0.349                      |
| isthmuscingulate thickness           | 799        | 0.0031  | -0.0013 | 0.0007               | 0.0035         | 0.0045 | 0.0002 | 0.88    | -0.29 | 4.10  | 0.377                | 0.775 | <b>4.6·10<sup>-5</sup></b> |
| medialorbitofrontal thickness        | 805        | 0.0000  | 0.0008  | 0.0004               | 0.0031         | 0.0039 | 0.0002 | 0.00    | 0.21  | 2.05  | 0.997                | 0.837 | <b>0.041</b>               |
| rostral anterior cingulate thickness | 803        | 0.0045  | 0.0077  | -0.0001              | 0.0044         | 0.0054 | 0.0003 | 1.03    | 1.41  | -0.36 | 0.302                | 0.159 | 0.718                      |
| rostralmiddlefrontal thickness       | 807        | 0.0018  | 0.0028  | -0.0003              | 0.0021         | 0.0027 | 0.0002 | 0.84    | 1.05  | -1.96 | 0.400                | 0.295 | 0.051                      |
| superiorfrontal thickness            | 807        | 0.0006  | -0.0005 | 0.0000               | 0.0017         | 0.0021 | 0.0001 | 0.35    | -0.24 | -0.36 | 0.730                | 0.814 | 0.717                      |
| lateralorbitofrontal surface area    | 801        | 0.0030  | 0.0032  | 0.0001               | 0.0036         | 0.0045 | 0.0003 | 0.84    | 0.71  | 0.54  | 0.401                | 0.477 | 0.592                      |
| medialorbitofrontal surface area     | 803        | 0.0021  | -0.0055 | 4.4·10 <sup>-5</sup> | 0.0048         | 0.0060 | 0.0003 | 0.43    | -0.91 | 0.14  | 0.668                | 0.361 | 0.889                      |
| Putamen                              | 813        | 0.0018  | -0.0015 | 0.0005               | 0.0027         | 0.0034 | 0.0002 | 0.67    | -0.43 | 2.71  | 0.502                | 0.666 | <b>0.007</b>               |

<sup>1</sup>Unadjusted *P* values are shown, with in **bold** those that are significant (*P* < 0.05) at the uncorrected level.

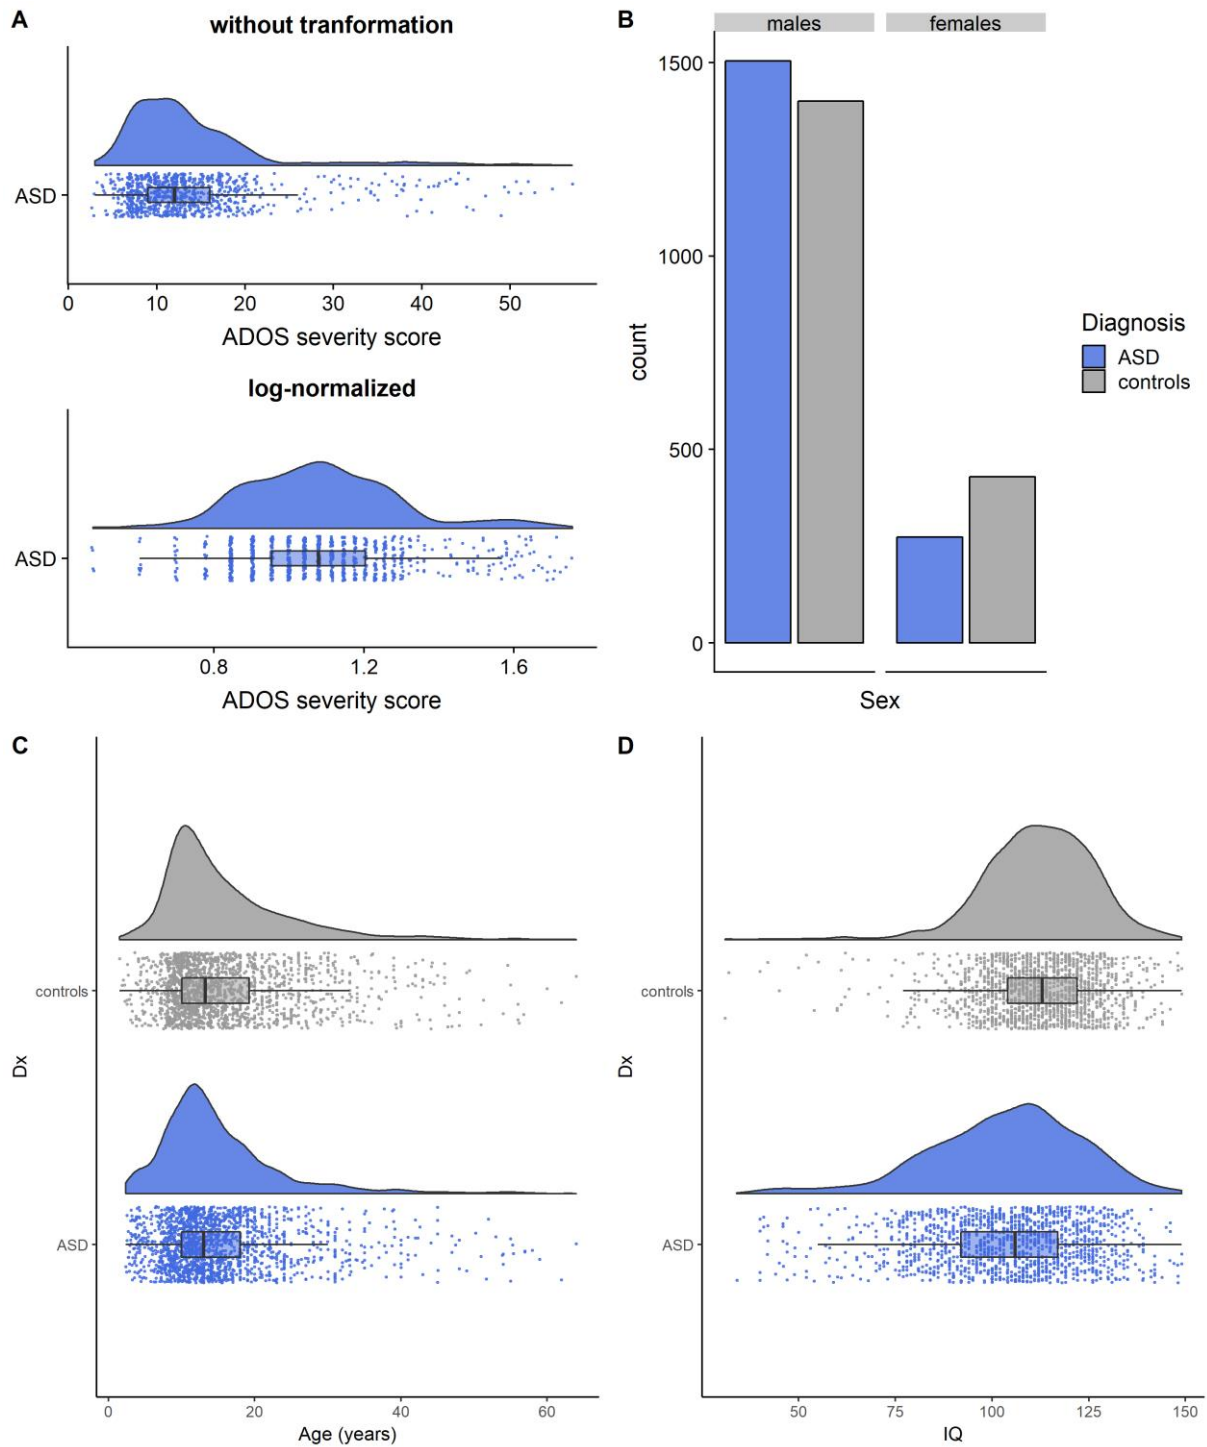

**Supplementary Figure 1. Distributions of variables of interest. (A) ADOS severity scores within cases, (B) sex, (C) age, (D) IQ. ADOS severity scores did not follow a normal distribution (top), so data were transformed using  $\log_{10}$  (bottom). Blue = ASD group; grey = control group.**



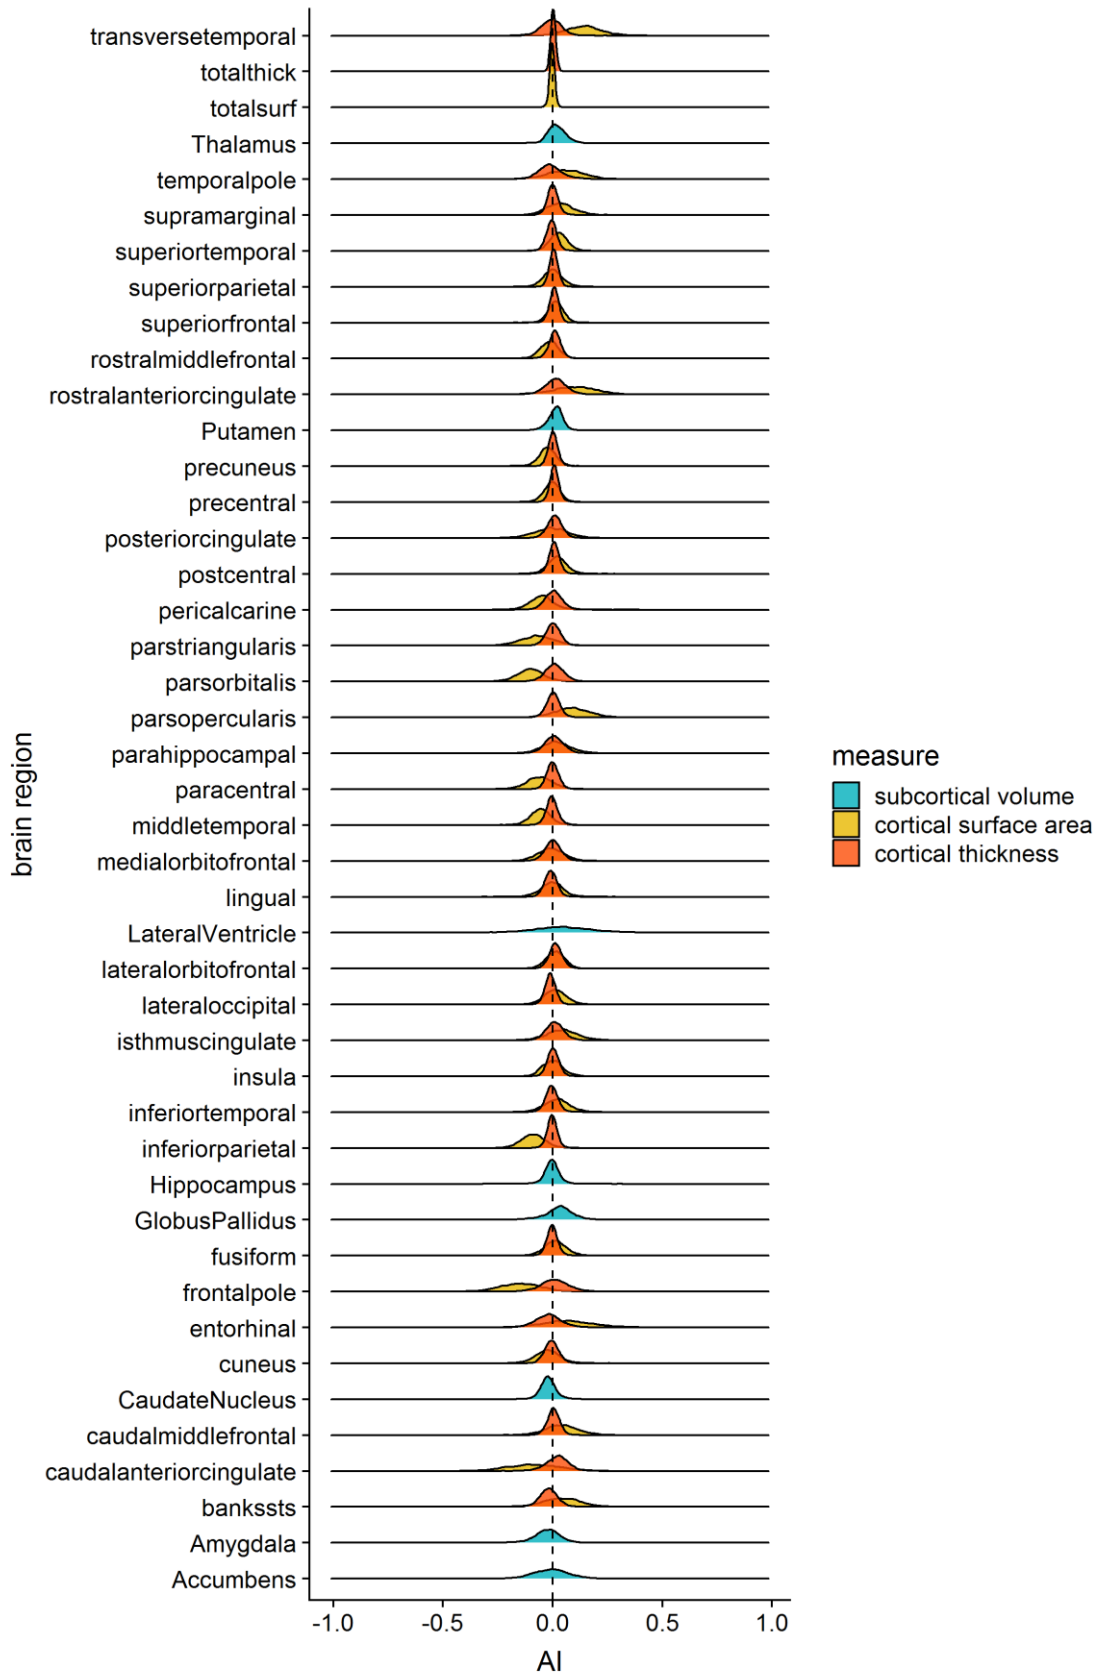

**Supplementary Figure 2. Joyplot of the distributions of AIs in the total sample (without winsorization).** Shown for subcortical volumes (*cyan*), cortical surface areas (*orange*), and cortical thicknesses (*red*). Lateral ventricles were categorized among subcortical measures

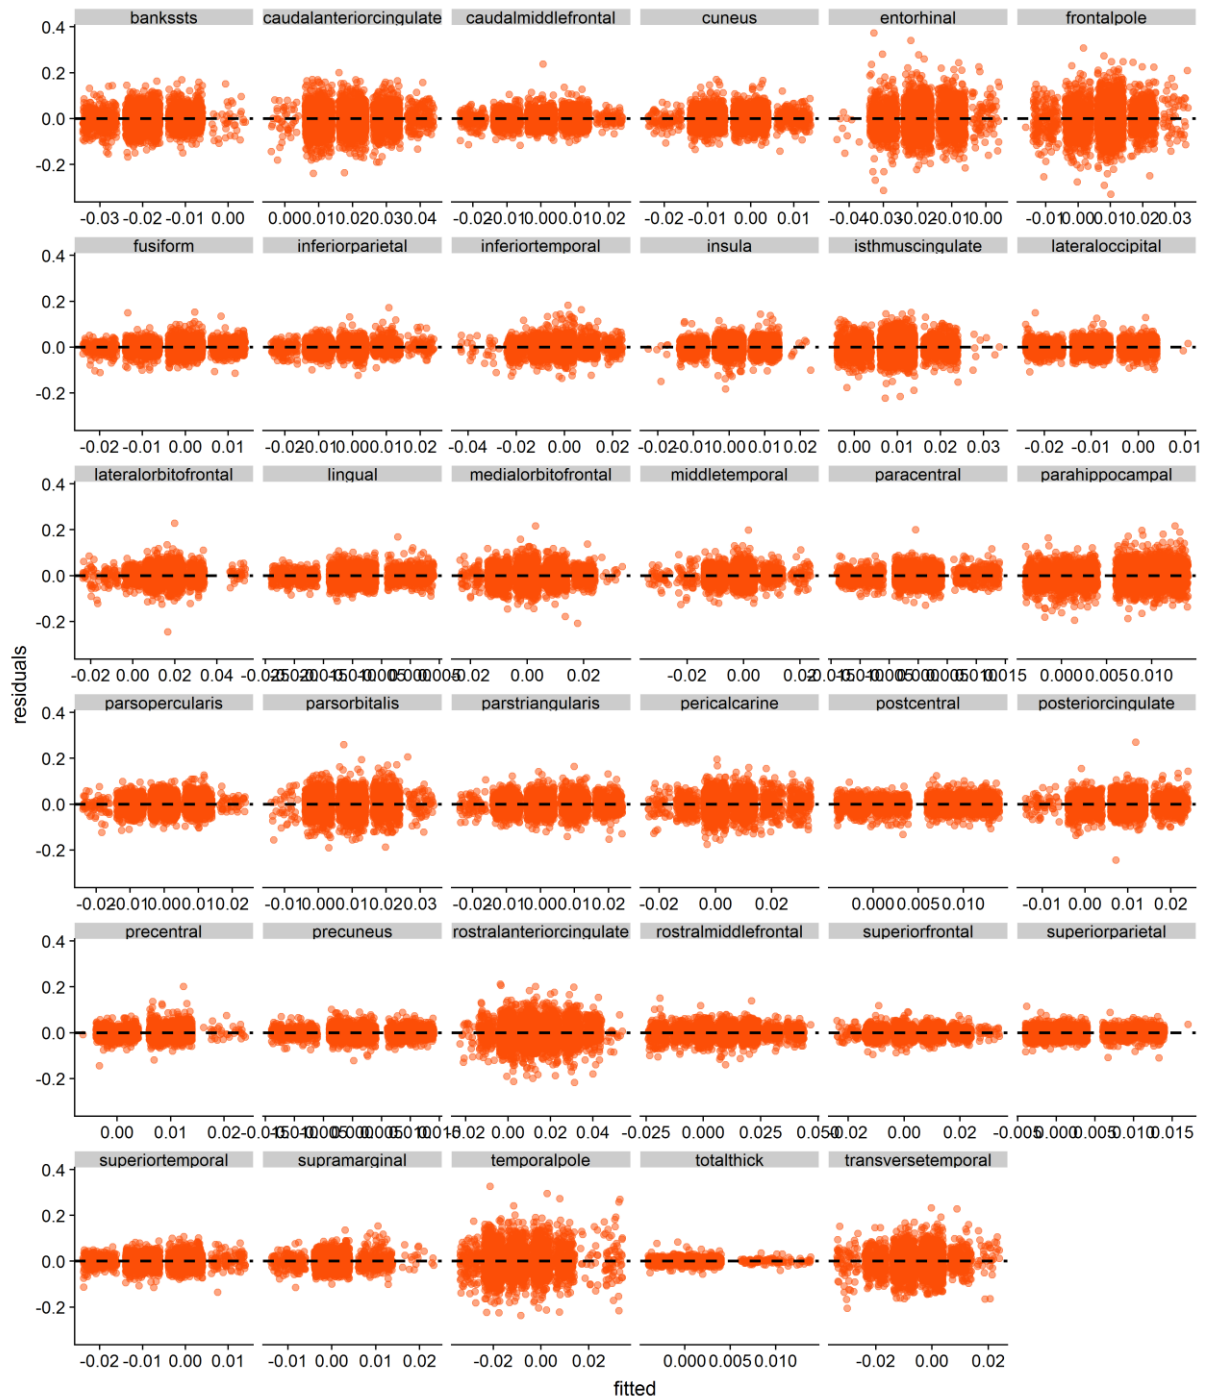

**Supplementary Figure 3. Residual plots of the linear mixed effects model analysis of cortical thickness AIs and the AI of the total average cortical thickness (totalthick).**

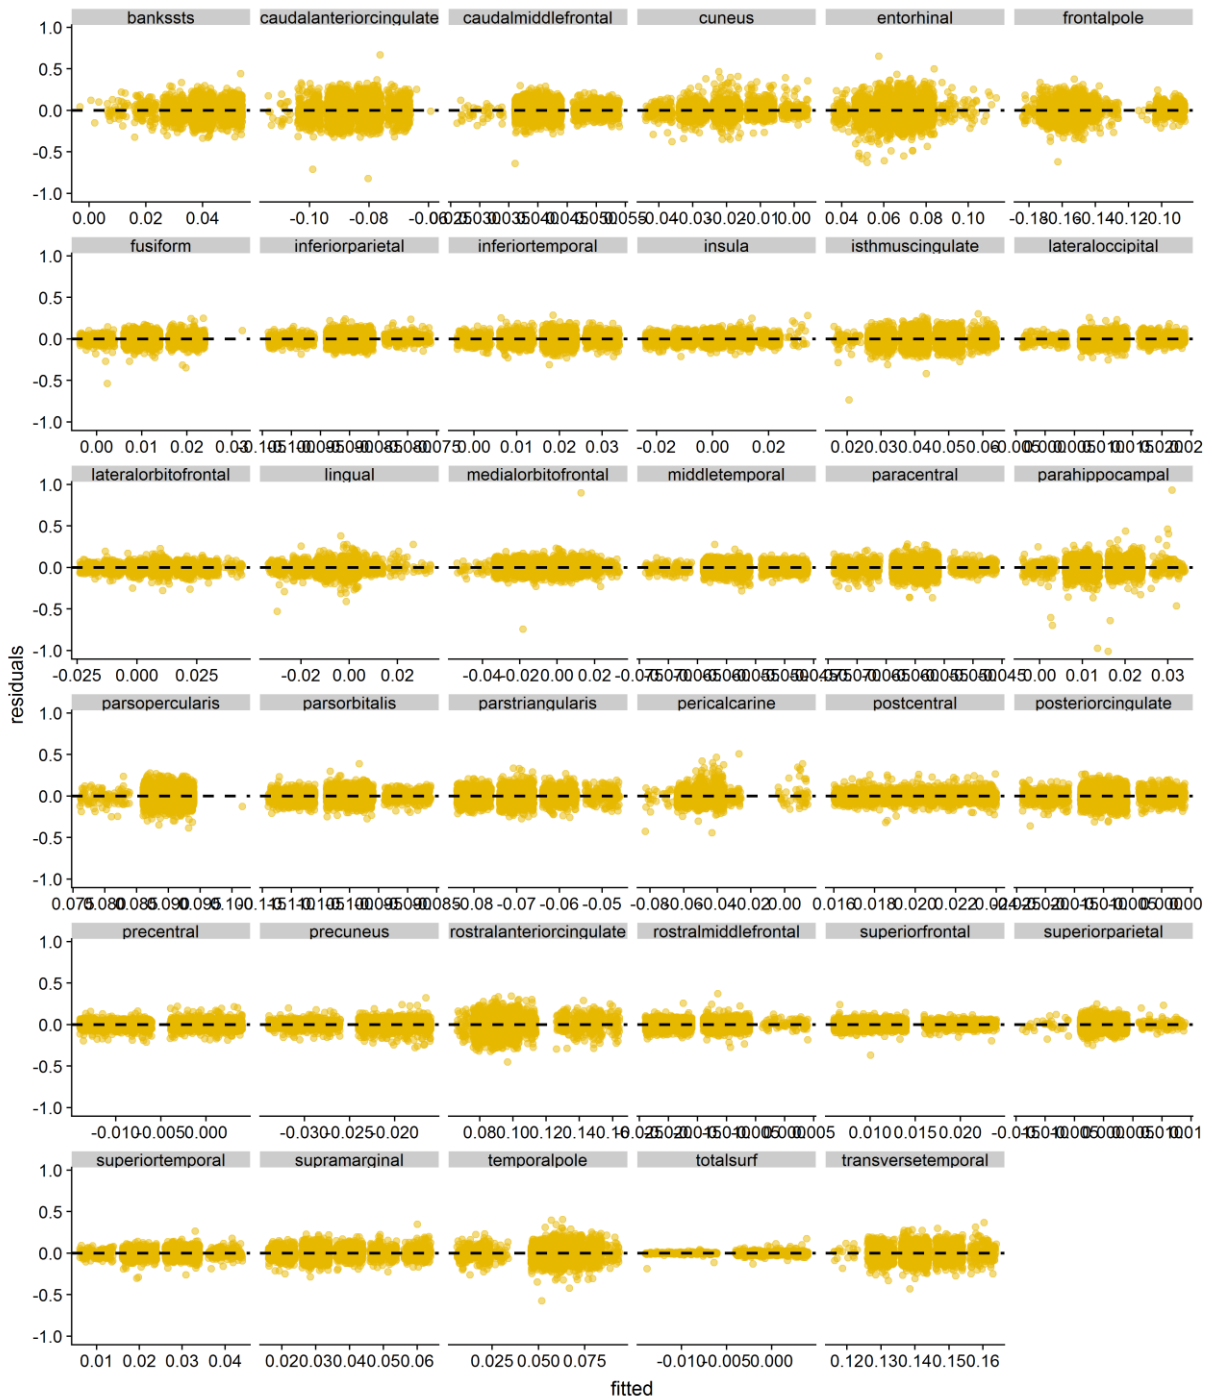

**Supplementary Figure 4. Residual plots of the linear mixed effects model analysis of cortical surface area AIs and the AI of the total cortical surface area (totalsurf).**

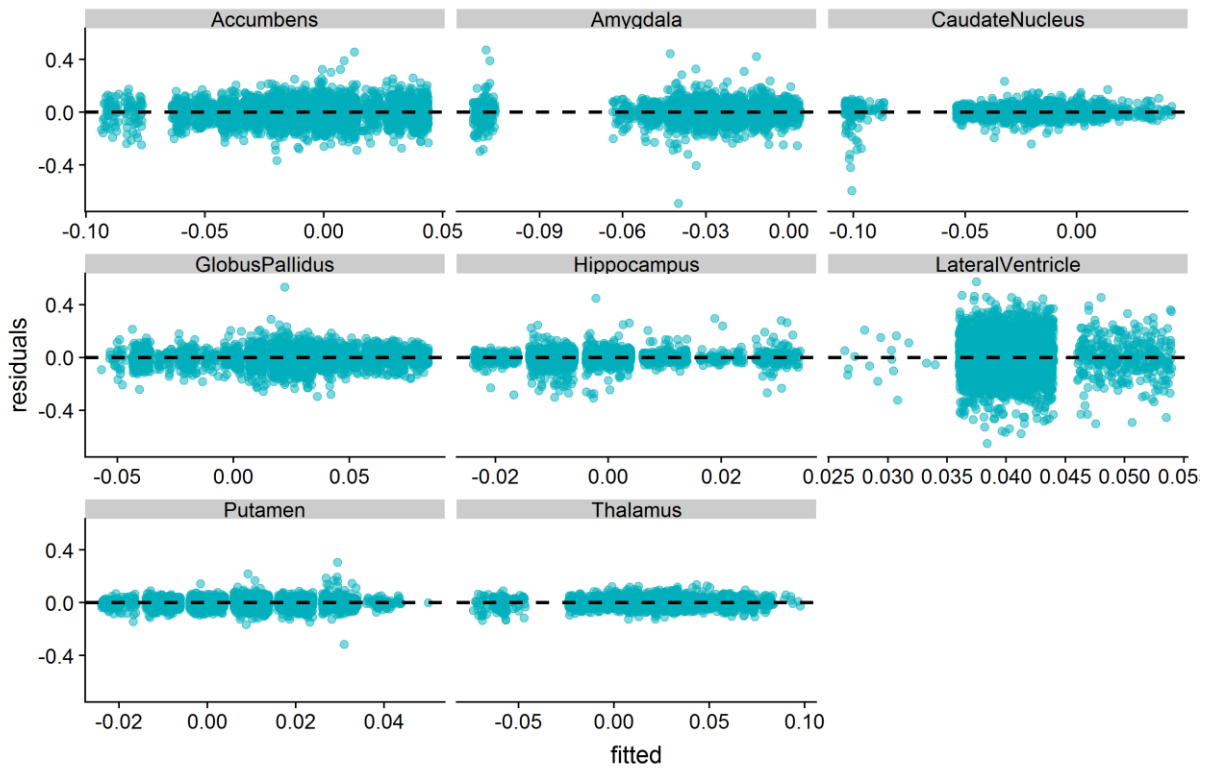

**Supplementary Figure 5. Residual plots of the linear mixed effects model analysis of subcortical volume AIs and the AI of the lateral ventricles.**

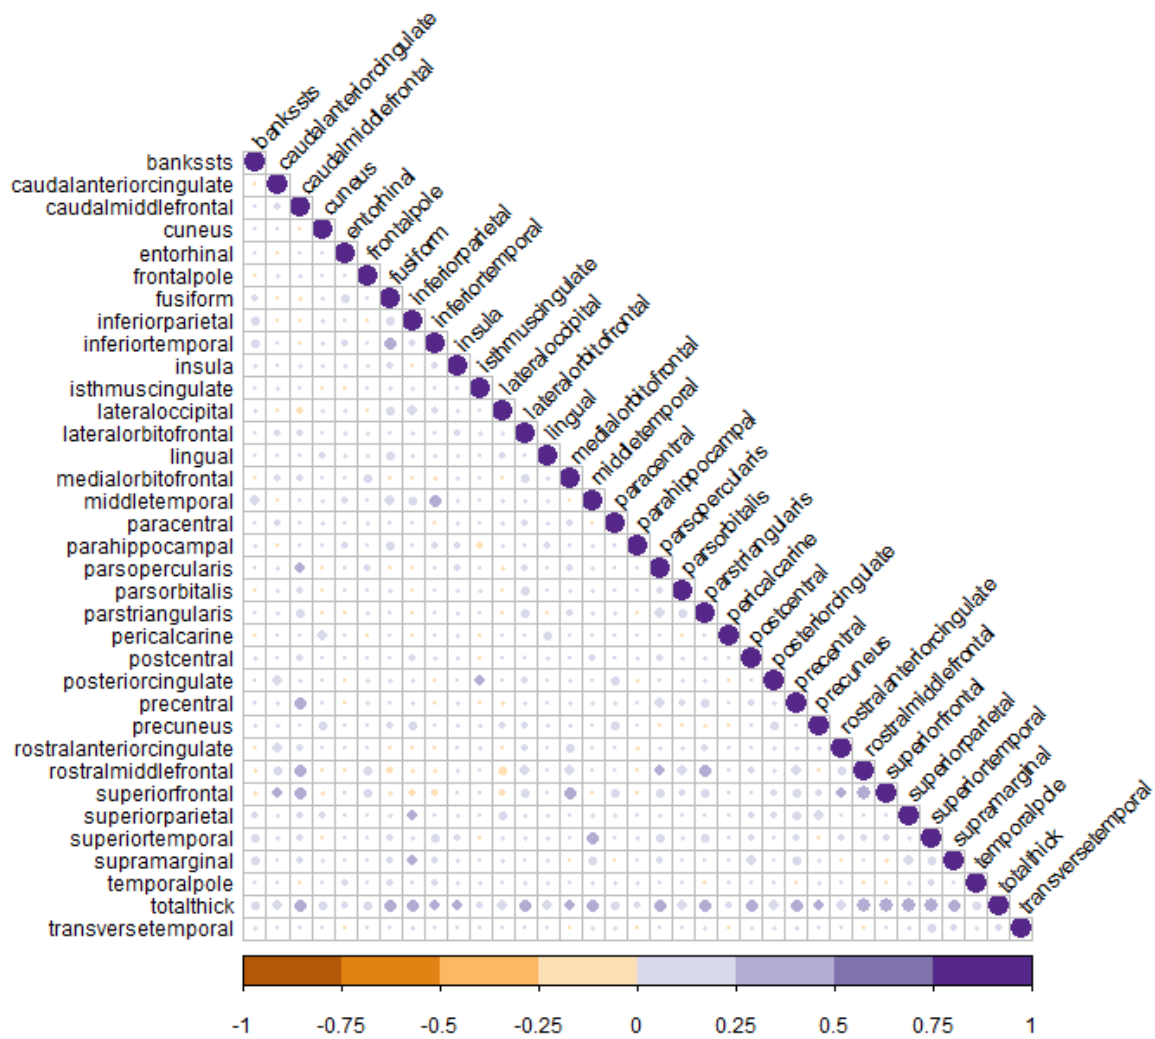

**Supplementary Figure 6. Correlations between AIs of cortical thickness.** Correlations ranged from -0.15 to 0.47. Negative correlations are shown in *orange*, and positive correlations are shown in *purple*. Color intensities and circle sizes are proportional to the magnitudes of the correlation coefficients.

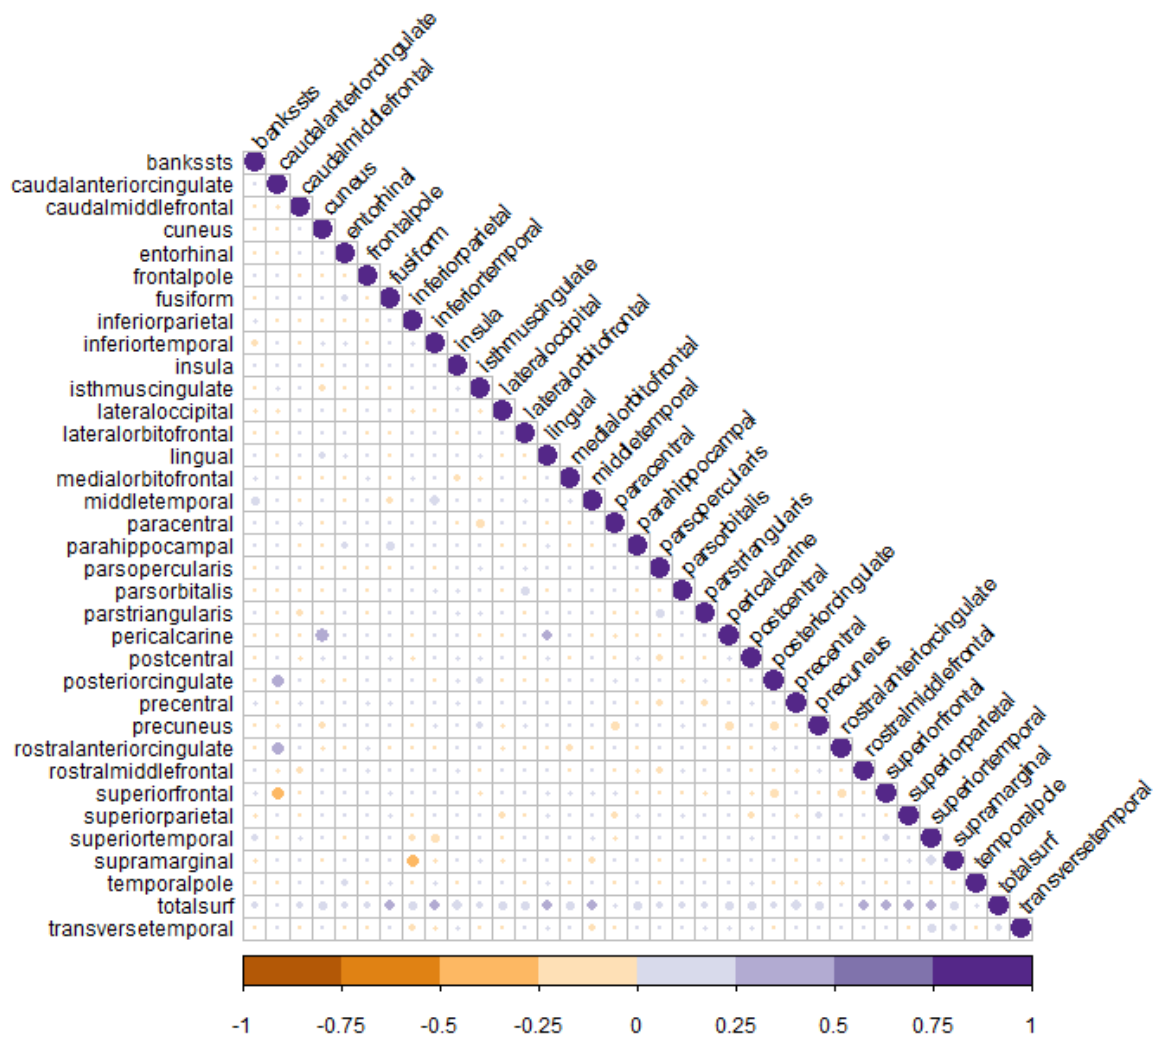

**Supplementary Figure 7. Correlations between AIs of cortical surface areas.** Correlations ranged from -0.35 to 0.49. Negative correlations are shown in *orange*, and positive correlations are shown in *purple*. Color intensities and circle sizes are proportional to the magnitudes of the correlation coefficients.

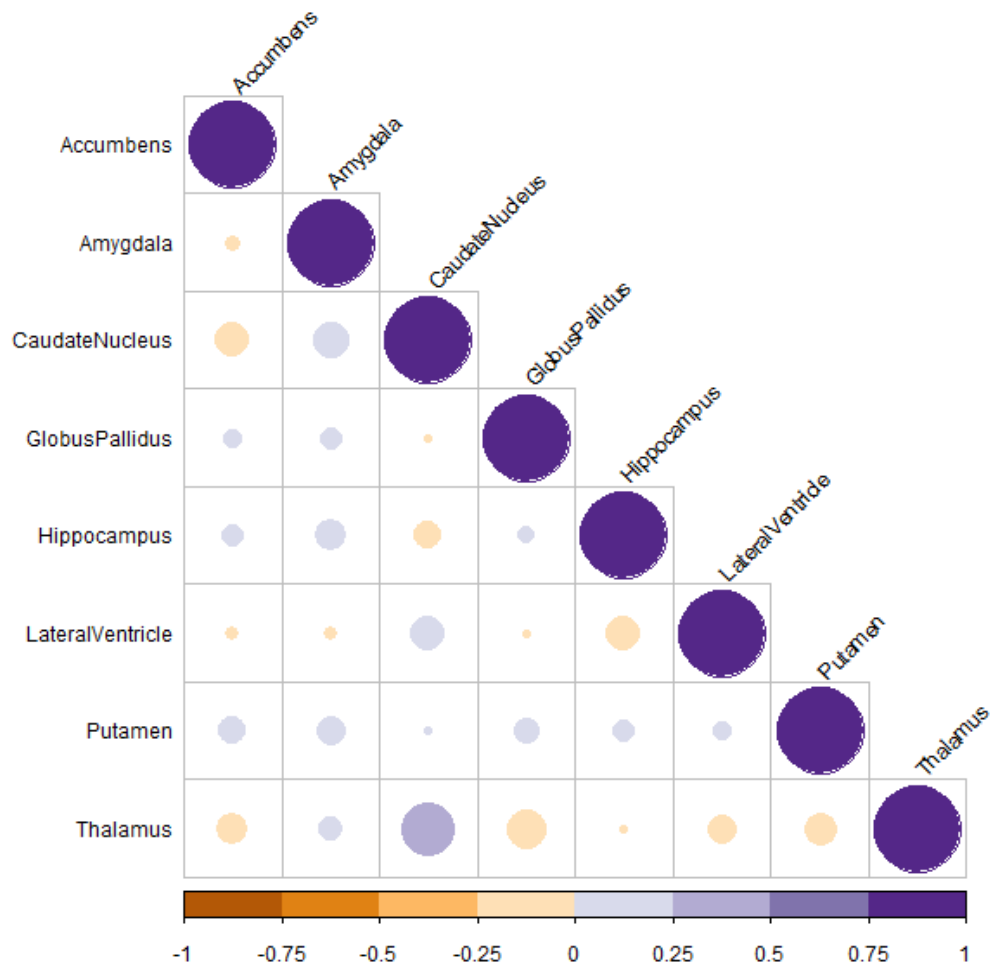

**Supplementary Figure 8. Correlations between AIs of subcortical volumes.** Correlations ranged from -0.20 to 0.38. Negative correlations are shown in *orange*, and positive correlations are shown in *purple*. Color intensities and circle sizes are proportional to the magnitudes of the correlation coefficients



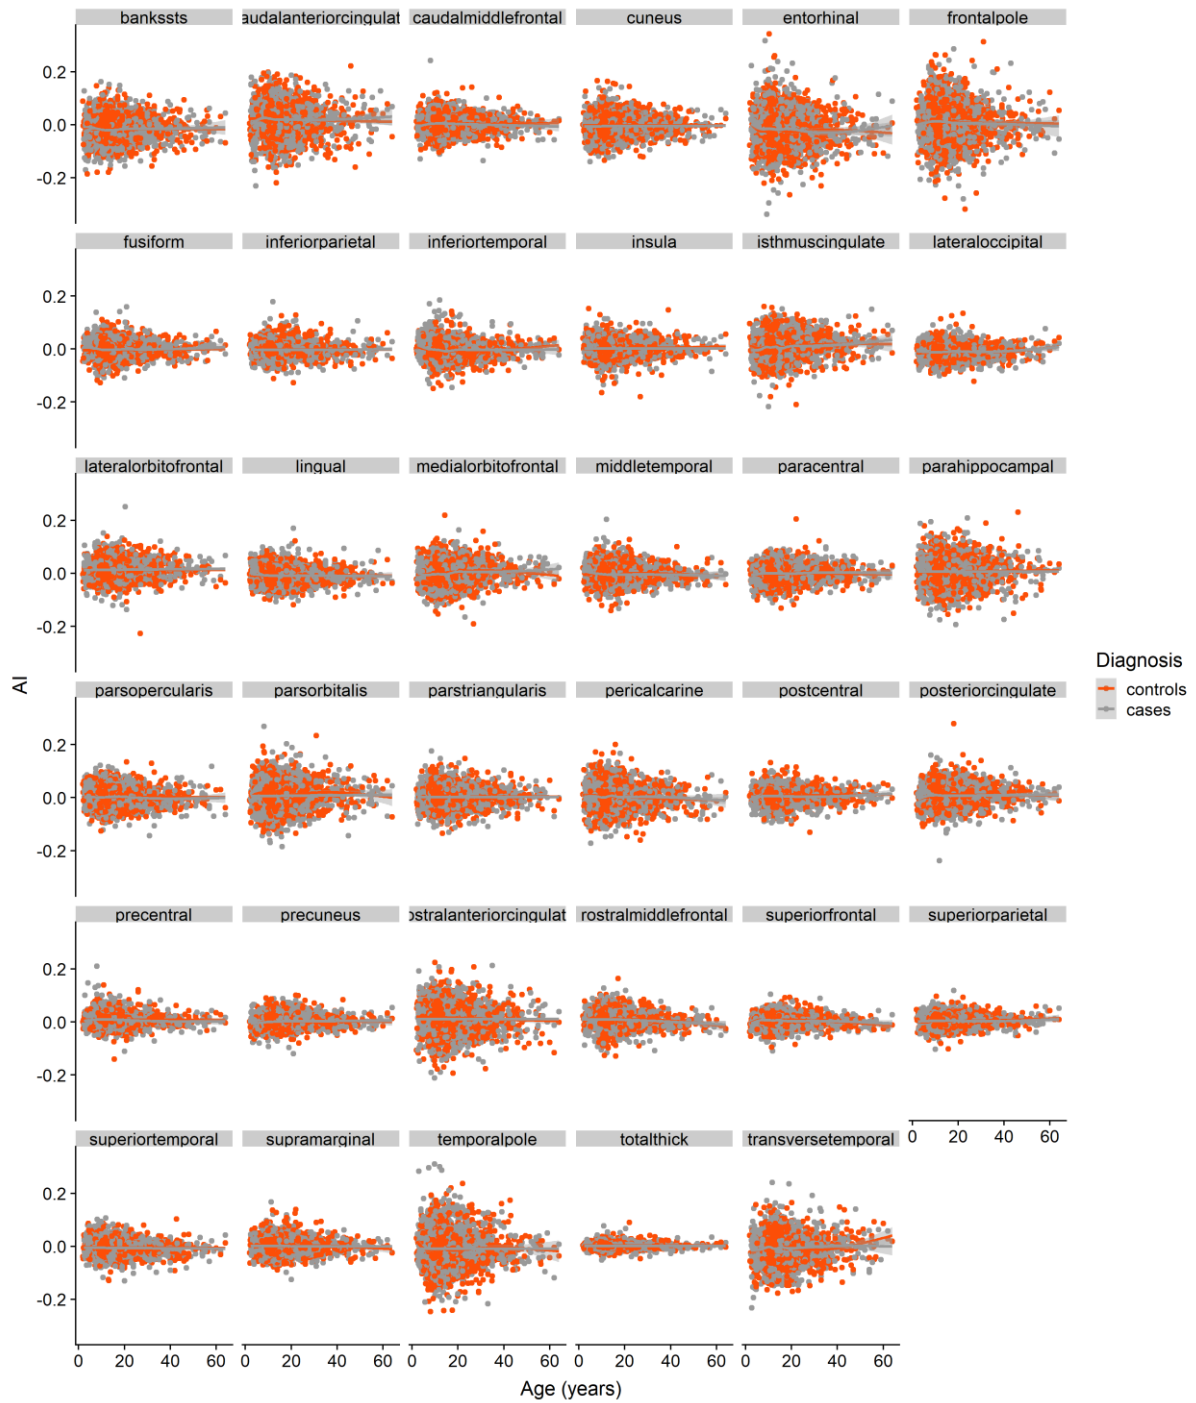

**Supplementary Figure 9. Scatter plots of the relationships between age and AIs of the total and regional cortical thicknesses.**



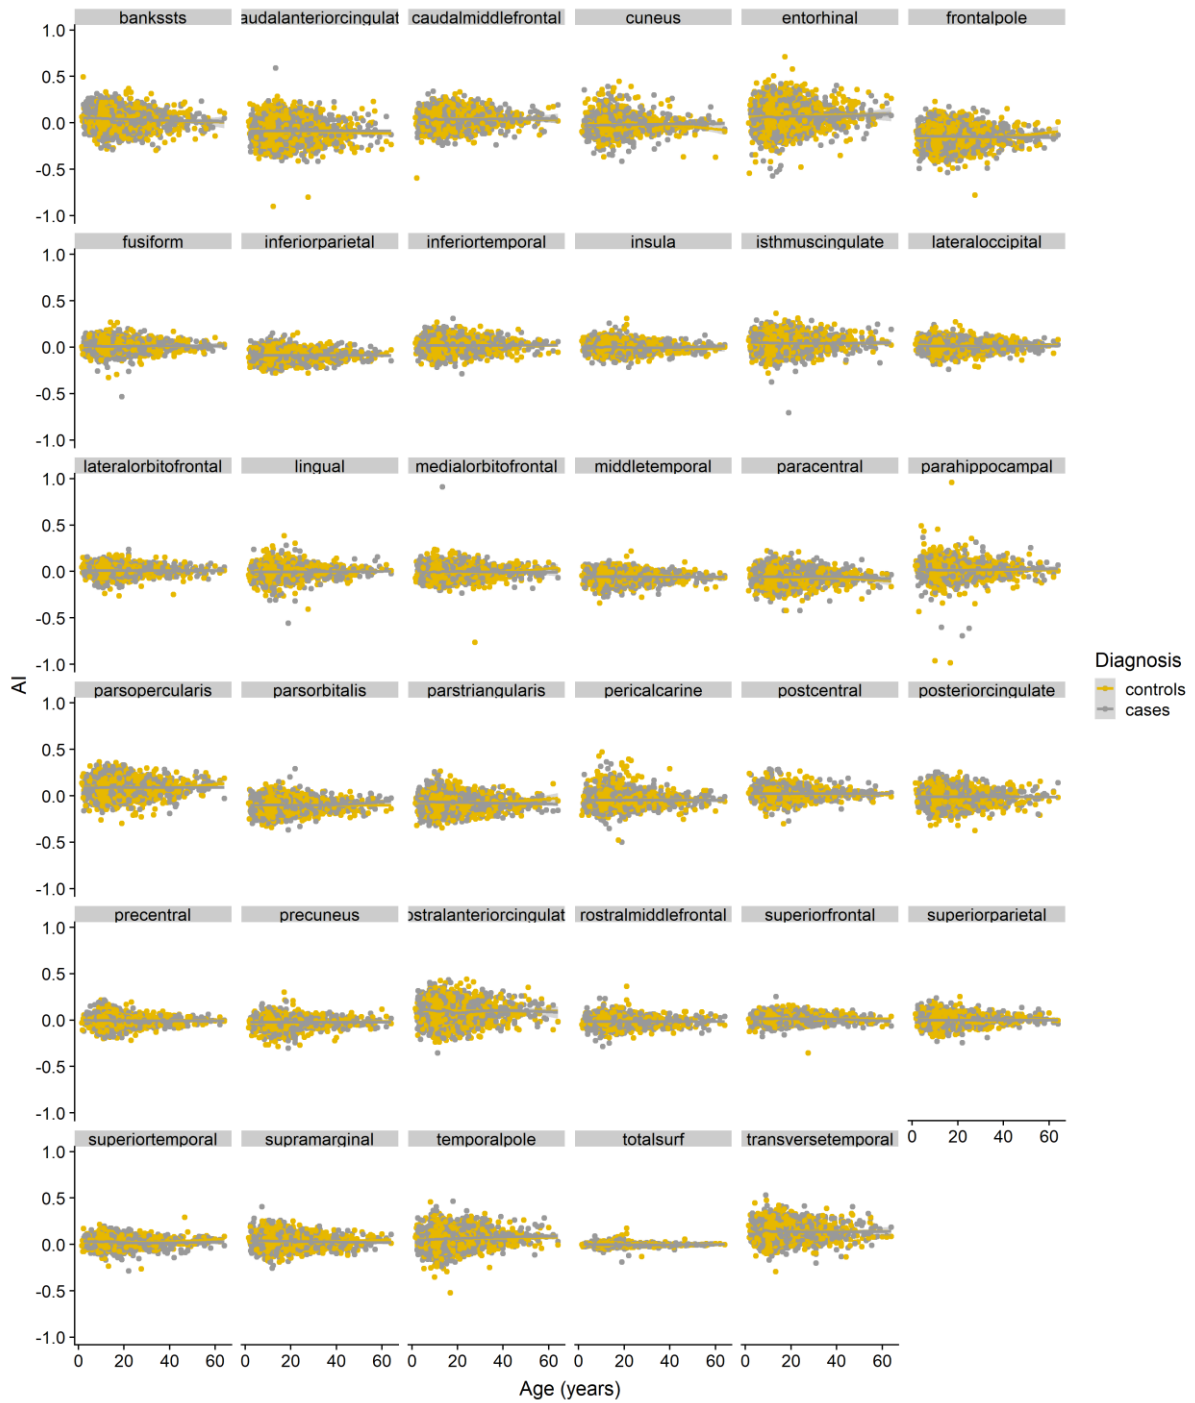

**Supplementary Figure 10. Scatter plots of the relationships between age and AIs of the total and regional cortical surface areas.**

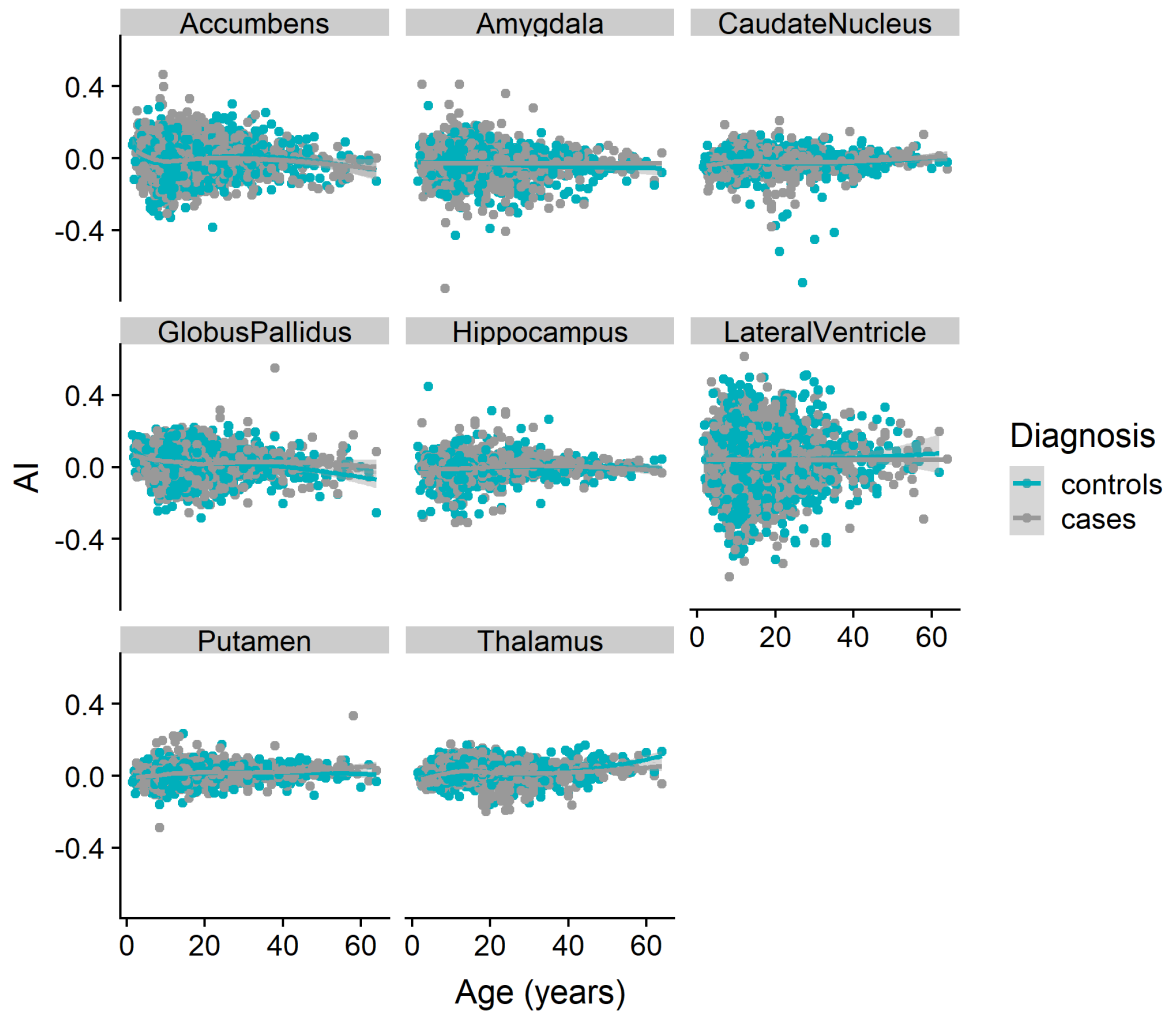

**Supplementary Figure 11. Scatter plots of the relationships between age and AIs of subcortical volumes and lateral ventricles.**
